**A team of heterochromatin factors collaborates with small RNA pathways to  
combat repetitive elements and germline stress**

Alicia N. McMurchy<sup>1</sup>, Przemyslaw Stempor<sup>1</sup>, Tessa Gaarenstroom<sup>1</sup>, Brian  
Wysolmerski, Yan Dong, Darya Aussiaikava, Alex Appert, Ni Huang, Paulina  
Kolasinska-Zwierz, Alexandra Sapetschnig, Eric Miska, and Julie Ahringer\*

The Gurdon Institute and Department of Genetics, University of Cambridge,  
Cambridge UK

<sup>1</sup>equal contribution

\*author for correspondence (j.ahringer@gurdon.cam.ac.uk)

## Abstract

Repetitive sequences derived from transposons make up a large fraction of eukaryotic genomes and must be silenced to protect genome integrity. Repetitive elements are often found in heterochromatin; however, the roles and interactions of heterochromatin proteins in repeat regulation are poorly understood. Here we show that a diverse set of *C. elegans* heterochromatin proteins act together with the piRNA and nuclear RNAi pathways to silence repetitive elements and prevent genotoxic stress in the germ line. Mutants in genes encoding HPL-2/HP1, LIN-13, LIN-61, LET-418/Mi-2, and H3K9me2 histone methyltransferase MET-2/SETDB1 also show functionally redundant sterility, increased germline apoptosis, DNA repair defects, and interactions with small RNA pathways. Remarkably, fertility of heterochromatin mutants could be partially restored by inhibiting *cep-1/p53*, endogenous meiotic double strand breaks, or the expression of MIRAGE1 DNA transposons. Functional redundancy among these factors and pathways underlies the importance of safeguarding the genome through multiple means.

## 1 **Introduction**

2 Heterochromatin, the more tightly packed form of chromatin, plays important roles in  
3 maintaining the structural and functional integrity of the genome (1). It is less  
4 transcriptionally active than euchromatin and highly enriched for repetitive elements  
5 such as transposons and satellite repeats, which are kept silent to maintain genome  
6 integrity. The heterochromatin state is stable and heritable across generations  
7 highlighting the importance of keeping certain regions of the genome repressed.

8       Histones in heterochromatin are marked with modifications associated with  
9 transcriptional repression such as H3K9 methylation. In organisms with point  
10 centromeres, heterochromatin is typically found in large domains adjacent to  
11 centromeres and telomeres (1). In *C. elegans*, heterochromatin associated histone  
12 methylations H3K9me2 and H3K9me3 are instead mostly found in many small  
13 domains on the distal arm regions of autosomal chromosomes (2). This pattern is  
14 likely to be related to the holocentric nature of *C. elegans* chromosomes, which have  
15 distributed centromeres rather than a single point centromere. Two histone  
16 methyltransferases carry out all H3K9 methylation (3). The SETDB1 homolog MET-  
17 2 carries out mono- and di-methylation of H3K9. SET-25 primarily carries out tri-  
18 methylation of H3K9, but it can generate all three methylated forms of H3K9. In the  
19 absence of both proteins, H3K9 methylation is undetectable, heterochromatic distal  
20 arm regions show reduced association with the nuclear lamina, and heterochromatic  
21 transgenes are desilenced (3).

22       A hallmark of heterochromatin is heterochromatin protein 1 (HP1), the first  
23 heterochromatin protein to be discovered through work in *Drosophila* (4, 5). HP1  
24 contains a chromodomain that binds to methylated H3K9, and it is essential for

25 heterochromatin maintenance (4). In addition to HP1, a large and diverse array of  
26 proteins is associated with heterochromatin, including nucleosome remodelers,  
27 histone modifying enzymes, histone binding proteins, and DNA binding proteins (6,  
28 7). However the functions and interactions of heterochromatin proteins are not well  
29 understood.

30       Many *C. elegans* proteins that have predicted functions in heterochromatin or  
31 transcriptional repression are important for development. These include MET-  
32 2/SETDB1, HPL-2/HP1, LIN-61, LIN-13, and LET-418/Mi-2 (8-13). HPL-2 is a *C.*  
33 *elegans* ortholog of heterochromatin HP1, and LIN-61 is a protein containing MBT  
34 (malignant brain tumor) repeats. Both HPL-2 and LIN-61 can bind to all methylated  
35 forms of H3K9 *in vitro* (12, 14, 15), and both can repress a heterochromatic reporter  
36 (3, 8, 16). LIN-13 is a multi-zinc finger protein (10). A complex containing LIN-13,  
37 HPL-2, and LIN-61 has been detected *in vivo*, and LIN-13 is required for the  
38 formation of HPL-2::GFP nuclear foci (13, 17). LET-418 is an ortholog of Mi-2, an  
39 ATP-dependent nucleosome remodelling component of the repressive NuRD and Mec  
40 complexes (9, 18, 19).

41       Mutants of *hpl-2*, *lin-61*, *lin-13*, *met-2*, and *let-418* display both germ line and  
42 somatic defects. *let-418* and *lin-13* null mutants are sterile (9, 10), *hpl-2* null mutants  
43 show temperature sensitive sterility (11), and *lin-61* and *met-2* null mutants have  
44 slightly reduced brood sizes (12). The underlying cause of the fertility defects is not  
45 known, but *hpl-2* mutants have been shown to produce abnormal oocytes, suggesting  
46 defective gametogenesis (8). Somatic defects are pleiotropic and show similarities  
47 among mutants, with most showing slow growth, somatic expression of germ line  
48 genes, synthetic vulval development defects, and larval arrest (some only at high  
49 temperature) (10, 11, 13, 16-18, 20-23). Additionally, genetic interactions have been

50 observed between some of the mutants, suggesting partially redundant functions, and  
51 that defects may result from alteration of a shared heterochromatin-linked process (12,  
52 17, 24).

53         The genomic distribution of only one of the above heterochromatin proteins  
54 has been studied. An HPL-2 ChIP-chip study in early embryos showed that most  
55 binding was on the distal arm regions of autosomes in a pattern of similar to  
56 H3K9me1 and H3K9me2; interestingly, binding to chromatin was not dependent on  
57 H3K9 methylation (14). HPL-2 was observed to be broadly genic, with additional  
58 association at promoters in central chromosome regions and at repeats on distal arm  
59 regions; however, no clear relationship between HPL-2 binding and gene expression  
60 changes was observed (14). Systematic and comparative analyses of heterochromatin  
61 factors are needed to understand their functions.

62         The genomic binding patterns of orthologs of some of the above factors  
63 suggest roles in the regulation of mobile elements. SETDB1 binds to promoters of  
64 developmentally regulated genes in mammalian embryonic stem cells, 40% of which  
65 are found next to or overlapping endogenous retroviruses (25-27). In addition,  
66 retrotransposons are derepressed in *Setdb1* knockout mouse ES cell lines and  
67 primordial germ cells (26, 28). Retrotransposons are also repressed by HP1 $\alpha$  and  
68 HP1 $\beta$  in mESCs, but it is a different set of retrotransposons than is targeted by  
69 SETDB1 (29). *Drosophila* HP1 binds to genes and to transposable elements,  
70 particularly in pericentric chromosomal regions, but transposable element expression  
71 in mutants has not been assessed (30, 31). A recent study showed that Mi-2 could  
72 bind to a LINE1 retrotransposon promoter and repress a LINE1 reporter in human and  
73 mouse cell lines (32). The genomic distribution of Mi-2 is unclear as different  
74 genome-wide binding studies in human ES cells have yielded conflicting results (33).

75           The expression of repetitive elements can be detrimental to genome stability  
76 due to the negative effects of homologous recombination and transposon-induced  
77 breaks. Because the germline produces the gametes that transmit genetic information  
78 across generations, silencing of repetitive elements is an absolute requirement for  
79 germ line health. A small RNA pathway called the piRNA pathway, present in most  
80 animals, plays a role in transposon silencing in the germ line (34). Recent work in *C.*  
81 *elegans* implicated HPL-2/HP1 and the H3K9me3 histone methyltransferase SET-25  
82 in piRNA pathway function, indicating a connection between heterochromatin and  
83 small RNA silencing of piRNA targets (35).

84           In the *C. elegans* germ line, the piRNA pathway involves generation of 21nt  
85 piRNAs that bind to the Piwi argonaute protein PRG-1 (36-38). This triggers  
86 generation of secondary 22G siRNAs that mediate silencing either in the cytoplasm or  
87 nucleus (35, 37, 39-47). Cytoplasmic silencing mechanisms are not well understood,  
88 but recent advances have been made in the understanding of transcriptional silencing.  
89 In the nucleus, the piRNA pathway engages a second small RNA pathway called the  
90 nuclear RNAi pathway, which orchestrates H3K9 and H3K27 methylation and/or  
91 inhibition of RNA Pol II (42, 46, 48, 49). Although the nrde pathway can be triggered  
92 by the piRNA pathway in the germ line, it is also active in the soma, with dedicated  
93 Argonaute proteins for germ line (HRDE-1) and soma (NRDE-3) (42, 46, 47, 50).  
94 Regions transcriptionally upregulated in *hrde-1* mutants were found to be enriched for  
95 retrotransposons, suggesting that repetitive elements may be endogenous targets in the  
96 germ line (51).

97           In addition to silencing transcription and maintaining the structural and  
98 functional integrity of the genome, heterochromatin also plays an important role in  
99 DNA repair. Heterochromatic compaction protects DNA from damage, and regulated

100 decondensation is important for damage repair (52). Additionally, in mammals,  
101 transient formation of heterochromatin occurs at the edges of double strand breaks,  
102 which involves recruitment of heterochromatin-associated proteins HP1 and  
103 nucleosome remodeller Mi-2, as well as methylation of H3K9 (53). This is thought to  
104 aid in damage repair by keeping the broken strands in proximity and inhibiting local  
105 transcription.

106           Here, through systematic genetic and genomic analyses, we investigate  
107 interactions and functions of five heterochromatin proteins (HPL-2/HP1, LIN-13,  
108 LIN-61, LET-418/Mi-2 and MET-2/SETDB1) and relationships with the piRNA and  
109 nuclear RNAi pathways. Our results reveal a nexus of factors that cooperate to  
110 prevent expression of repetitive elements and protect the germ line from endogenous  
111 damage.

112

113

## 114 **Results**

### 115 **Heterochromatin factors show partially redundant functions for fertility**

116 The five genes we study here (*hpl-2*/HP1, *lin-13*, *lin-61*, *let-418*/Mi-2, and *met-2*) are  
117 needed for normal fertility ((9-12, 54, 55); Supplementary file 1). Previous analyses  
118 uncovered genetic interactions in fertility between three pairs of genes (*hpl-2* and *lin-*  
119 *13*, *lin-61* and *hpl-2*, *lin-61* and *met-2*; (12, 17, 24); however, the remaining six  
120 combinations were untested. Using RNAi in mutant backgrounds, we found that  
121 double loss of function of each of the uninvestigated pairs also caused synthetic  
122 sterility, which we also observed for three tested double mutant combinations (Figures  
123 1A-C). The single mutants show complex and pleiotropic germ line defects, but they  
124 all showed a high occurrence of abnormal oocytes, suggesting that sterility may be  
125 due in part to abnormal oogenesis (Figure 1-figure supplement 1). The fertility defects  
126 of single mutants and the enhancement in double loss of function combinations  
127 indicate that the five heterochromatin factors each have unique and partially  
128 redundant germ line roles. The genetic interactions suggest that the five factors may  
129 cooperate in a germ line process required for fertility.

130

### 131 **HPL-2, LIN-13, LIN-61, LET-418, and MET-2 are enriched at repetitive** 132 **elements and show extensive co-binding**

133 To begin to investigate the roles of HPL-2, LIN-13, LIN-61, LET-418, and MET-2 in  
134 genome regulation, we mapped their binding locations using ChIP-seq analyses in  
135 young adults and compared the patterns to each other and to those of H3K9me2 and  
136 H3K9me3. Binding of each of the five factors is enriched on the distal arm regions of



137 the autosomes (Figure 2A; Figure 2-figure supplement 1A), as previously seen for  
138 H3K9me2, H3K9me3, and HPL-2 (2, 14, 56). Examination of ChIP-seq signals at a  
139 more local level revealed similar binding patterns for the five heterochromatin  
140 proteins (Figure 2B). Indeed, genome-wide correlation analyses showed significant  
141 positive correlations in signal between all datasets (Figure 2-figure supplement 1B).  
142 In addition, signals for each of the five heterochromatin factors showed high  
143 correlation with H3K9me2 but not with H3K9me3 (Figure 2B, Figure 2-figure  
144 supplement 1B).

145 To further investigate patterns of binding, we identified regions of peak  
146 enrichment for each dataset (Figure 2-figure supplement 1C, Figure 2-source data 1;  
147 12449 to 19313 peaks per factor). For each factor, peaks are enriched on the distal  
148 chromosomal regions of autosomes; most peaks are intergenic or located in introns,  
149 with enrichment for intergenic binding in central chromosomal regions and  
150 enrichment for intronic binding in distal arm regions (Figure 2-figure supplement 1A).

151 To facilitate comparisons between datasets, we merged peak calls from all  
152 factors into a superset termed Any5 (n=33,301), then annotated each region in the  
153 Any5 set for the factors bound (Figure 2-source data 1). There is a high degree of  
154 peak overlap among the five factors, with 58% of sites in the Any5 set being bound  
155 by >1 factor (Figure 2C). Sites uniquely bound by only one factor are in the minority  
156 within each dataset (3.4%– 27.4%, Figure 2C and Figure 2-figure supplement 1C).  
157 Strikingly, the largest binding group contains all five factors (termed “All5”; Figure  
158 2C). Enrichments for H3K9me2 and H3K9me3 vary between binding classes, with  
159 the All5 class showing high enrichment for H3K9me2 (Figure 2C). These results  
160 show that HPL-2, LET-418, LIN-13, LIN-61, and MET-2 extensively overlap in  
161 binding genome-wide.

162           The previous HPL-2 ChIP-chip study in embryos noted binding at repetitive  
163 elements, which are concentrated on the distal arm regions of autosomes (14). Repeat-  
164 rich heterochromatin in *C. elegans* is distributed in small domains rather than being  
165 concentrated in large regions as in mammals or *Drosophila*; therefore, the sequences  
166 of most repetitive regions have been determined. To investigate the association of  
167 heterochromatin factor binding at repetitive DNA, we used the recent Dfam2.0  
168 annotation, which classified 62,331 individual repetitive elements in *C. elegans* into  
169 184 repeat families, which were further classified by type (e.g., DNA transposon,  
170 retrotransposon, satellite, or unknown (57)).

171           We observed that HPL-2, LIN-13, LIN-61, LET-418, and MET-2 are all  
172 strongly associated with repetitive DNA elements (Figure 2C). A large proportion of  
173 each factor's peaks overlaps a repeat sequence (46.3% - 71.0%), and regions with all  
174 five factors have particularly strong repeat association (76.6%, Figure 2C, Figure 2-  
175 figure supplement 1C). Furthermore, of the total set of 62331 annotated repetitive  
176 elements, nearly half (46%) overlap a peak of at least one factor, and 8002 (13%) by  
177 all five factors (Figure 2-figure supplement 1D). All repeat types and 180 of 184  
178 repeat families are associated with a heterochromatin factor peak; of these, 105 repeat  
179 families are enriched for binding by at least one factor (Figure 2-source data 2). HPL-  
180 2, LIN-13, LIN-61, MET-2, and H3K9me2 have a particularly strong association with  
181 Helitron families; LET-418 shows generally lower enrichment on repeat families than  
182 the other factors (Figure 2D; Figure 2-figure supplements 2-6).

183           H3K9me2 and H3K9me3 show different patterns of repeat enrichment.  
184 H3K9me2 is more associated with DNA transposons and satellite repeats, similar to  
185 the heterochromatin factors, whereas H3K9me3 is particularly associated with  
186 retrotransposon families, especially LINE and SINE elements (Figure 2D; Figure 2-

187 figure supplements 7-8). We also observed that H3K9me2 and all heterochromatin  
188 factors are enriched at telomeres, whereas H3K9me3 is not (Figure 2-figure  
189 supplement 1E). The binding and co-association of HPL-2, LET-418, LIN-13, LIN-  
190 61, and MET-2 at repetitive elements suggests roles in the regulation of these  
191 sequences.

192

193 **Repetitive elements are desilenced in *hpl-2*, *lin-13*, *lin-61*, *let-418*, and *met-2 set-***  
194 **25 mutants**

195 Because silencing of repetitive DNA elements is important for germ line function, we  
196 considered that the heterochromatin factors might function in preventing repeat  
197 expression. To investigate this possibility, we generated and analysed RNA sequence  
198 expression data for wild-type and heterochromatin mutant adults. MET-2 deposits  
199 H3K9me1 and H3K9me2, but all three methylation states of H3K9 are still present in  
200 *met-2* mutants (at lower levels) due to the action of SET-25 (3). Therefore we  
201 assayed a *met-2 set-25* double mutant, in which H3K9 methylation was not detectable  
202 (3). For each strain, we performed two biological replicates and differential  
203 expression analyses of the 62,331 Dfam2.0 repeat elements.

204 We observed upregulation of repetitive elements in every mutant strain (*hpl-2*,  
205 *let-418*, *lin-13*, *lin-61*, and *met-2 set-25*) (Figures 3A-D, Figure 3-figure supplement 1,  
206 Figure 3-source data 1). A total of 71 individual repeat elements representing 29  
207 different families were upregulated in at least one mutant (Figure 3-source data 2;  
208 upregulation of 61/71 individual elements was confirmed based on uniquely mapping  
209 reads, see Methods). We observed a striking overlap in the sets of repetitive elements  
210 regulated by the heterochromatin factors: 41% of elements are upregulated in more

211 than one mutant (Figure 3A; Figure 3-source data 2). Furthermore, seven repeat  
212 elements are upregulated in all five strains, all of which are MIRAGE1 DNA  
213 transposable elements (Figures 3A, C, D, Figure 3-source data 2). The majority of  
214 repetitive elements upregulated in each heterochromatin mutant strain are DNA  
215 transposons, but retrotransposons are enriched for being upregulated (Figure 3B).  
216 Mutants show variation in the classes of repeats regulated; for example, SINE  
217 retrotransposons are particularly affected in *let-418* mutants, while many Helitron  
218 elements are upregulated in *lin-13* mutants (Figure 3B).

219 Overall, the total number of individual repetitive elements found with  
220 significantly altered expression is extremely small (<1%) relative to the >30,000 with  
221 factor binding, indicating that binding does not generally regulate repeat transcription.  
222 There are many types of repetitive elements, and only a small fraction would be  
223 expected to have potential for RNA expression. For example, 67% of repetitive  
224 elements are predicted to be non-autonomous DNA transposons, which would be  
225 mobilised in trans by a transposase encoded by another repetitive element, and many  
226 annotated elements are small fragments of larger elements. We therefore wondered  
227 whether the upregulation of repetitive element expression in heterochromatin mutants  
228 might be particularly associated with transposases or retrotransposons. Of 62331  
229 Dfam2.0 elements, 221 overlap a predicted transposase ORF, and 1085 are annotated  
230 as LTR retrotransposons. We found that elements upregulated in any heterochromatin  
231 factor mutant are 83-fold enriched for containing a transposase (21 of 71) and 10-fold  
232 enriched for LTR retrotransposons (13 of 71), together accounting for nearly half of  
233 upregulated repeats. Therefore, a key role of heterochromatin factors is to suppress  
234 expression of repetitive element transposases. The widespread binding of  
235 heterochromatin factors to non-expressed repetitive elements is likely to play roles

236 other than in the regulation of transcription. These could include preventing the  
237 cutting, copying, or movement of elements, or maintaining genome integrity by  
238 suppressing homologous recombination between repetitive elements (58, 59).

239 We also analysed alterations in protein coding gene expression in the  
240 heterochromatin mutants. Consistent with roles in repression, we identified three to  
241 five times more genes with upregulated expression in each mutant strain compared to  
242 those with reduced expression (267-513 upregulated genes per mutant; Figure 3-  
243 source data 3). Additionally, there is a high degree of overlap among the upregulated  
244 genes; of the total set of 1155 genes upregulated in any of the five mutant strains, 404  
245 are upregulated in more than one (Figure 3-source data 3). Heterochromatin factors  
246 are enriched at upregulated genes, but not downregulated genes (except for genes  
247 misregulated in *let-418* mutants); additionally, both H3K9me2 and H3K9me3 are  
248 enriched at upregulated genes in all mutant strains (Figure 3-figure supplement 2).  
249 Enrichment for all factors and H3K9 methylation is particularly strong at genes  
250 upregulated in *met-2 set-25* mutants (Figure 3-figure supplement 2). These  
251 associations suggest direct roles in repression.

252

253 **Repression of desilenced MIRAGE1 elements partially restores fertility of**  
254 **heterochromatin mutants.**

255 The silencing of repetitive elements is a universal conserved feature of germ line  
256 function. The prominent upregulation of MIRAGE1 elements in all heterochromatin  
257 mutants prompted us to ask whether expression of this element might play a role in  
258 their reduced fertility. MIRAGE1 is an autonomous DNA transposable element that  
259 has two open reading frames. Of 69 MIRAGE1 element annotations in Dfam2.0, only

260 six are full length. These six, plus an additional six partial MIRAGE1 elements are  
261 upregulated in at least one heterochromatin mutant, and both ORFs show upregulation.

262 We first examined the tissue distribution of MIRAGE RNA using RNA-FISH  
263 (60). As expected from the RNA-seq results, wild-type adults had very low levels of  
264 MIRAGE1 RNA-FISH signal in germ line and soma (Figure 3E and Figure 3-figure  
265 supplement 3). In three tested heterochromatin mutants (*hpl-2*, *let-418*, and *lin-13*),  
266 we observed abundant germ line localized MIRAGE1 RNA whereas somatic  
267 expression remained low (Figure 3E and Figure 3-figure supplement 3). Therefore,  
268 *hpl-2*, *let-418*, and *lin-13* are important for repression of MIRAGE1 in the germ line.

269 To test whether upregulation of MIRAGE1 contributes to sterility, we used  
270 two sets of RNAi clones to simultaneously knockdown ORF1 and ORF2 (sets termed  
271 *mirage-A* and *mirage-B*). *mirage-A* and *mirage-B* target 16 different MIRAGE1  
272 elements, including all full length elements and most of the MIRAGE1 elements  
273 upregulated in each of these mutants (8/8 for *let-418*, 7/8 for *lin-13*, and 10/11 for *hpl-*  
274 *2*). To assess an effect on fertility, we grew *hpl-2*, *lin-13*, and *let-418* mutants at 25°C,  
275 a condition under which they are nearly sterile, and tested for an increase in brood  
276 size after RNAi knockdown. Remarkably, RNAi of MIRAGE1 using *mirage-A* or  
277 *mirage-B* sets of RNAi clones led to a small but significant increase in fertility of all  
278 three mutants, showing that inappropriate MIRAGE1 expression contributes to their  
279 sterility (Figure 4A). We also observed that MIRAGE1 RNAi resulted in  
280 amelioration of somatic growth defects (not shown). These results indicate that one  
281 mechanism by which heterochromatin proteins promote normal germ line function is  
282 via the repression of repetitive elements, in particular those encoding transposases.

283

284 **Heterochromatin mutants display DNA repair defects, increased germ line**  
285 **apoptosis and fertility dependence on CEP-1/p53**

286 Desilencing of repetitive elements has been reported to cause DNA damage in other  
287 organisms (61); therefore, repeat expression in heterochromatin mutants might lead to  
288 genotoxic stress and genome instability in the germ line. Consistent with this, loss of  
289 *lin-61* leads to replication stress and genome instability, with increased germ line and  
290 somatic mutation frequency (62, 63). *lin-61* mutants also have defects in DNA repair  
291 (62, 63). A previous study reported that an *hpl-2(tm1489)* null mutant strain was  
292 hypersensitive to ionizing radiation (IR) (64); however, we found that this strain also  
293 harboured a deletion in the *polq-1* gene, which encodes DNA polymerase theta.  
294 Because *polq-1* mutants are reported to have increased sensitivity to DNA damaging  
295 agents and display genome instability (65), it was unclear if the defects observed were  
296 due to *hpl-2* (see Methods).

297 To determine whether *hpl-2* has a role in DNA repair, we tested the response  
298 of the isolated *hpl-2(tm1489)* mutant to IR induced DNA damage. Following IR, we  
299 observed that *hpl-2* mutants show higher levels of oocyte fragmentation compared to  
300 wild type, suggesting that they are defective in DNA repair (Figure 5-figure  
301 supplement 1). Additionally, *hpl-2* mutant germ lines are hypersensitive to induction  
302 of phosphorylation of the DNA damage checkpoint kinase CHK-1 (Figure 5-figure  
303 supplement 1). The hypersensitivity of *hpl-2* and *lin-61* mutants to exogenous DNA  
304 damage are consistent with increased genotoxic stress in the germ line.

305 We considered that the repeat desilencing and DNA repair defects of  
306 heterochromatin mutants might lead to increased germ line apoptosis, and thereby  
307 contribute to germ line and fertility defects. In wild-type animals, physiological

308 apoptosis occurs in the pachytene region of the gonad, with around half of the initially  
309 produced germ cells eliminated by apoptosis as a quality control mechanism (66).  
310 DNA damage causes increased apoptosis over physiological levels, and this increase  
311 is dependent on *cep-1/p53* (67, 68). To assess germ line cell death in the  
312 heterochromatin mutants we used a CED-1::GFP reporter, which allows visualization  
313 of apoptotic germ cells in adult animals (69). We observed that *hpl-2*, *lin-13*, *lin-61*,  
314 and *set-25 met-2* mutants all displayed increased germ line apoptosis (Figure 5; *let-*  
315 *418* was not assayed because the apoptosis reporter used is genetically linked). Thus,  
316 heterochromatin factor mutants have increased germ cell death.

317           p53 is important for transduction of the DNA damage response and other  
318 stresses, and *C. elegans cep-1/p53* is required for damage induced cell death (67, 68).  
319 We used RNAi to test whether activation of p53 dependent pathways played a role in  
320 heterochromatin mutant sterility. Following RNAi of *cep-1/p53*, we found that the  
321 brood sizes of *hpl-2*, *lin-13*, and *let-418* mutants grown at 25°C were modestly  
322 increased (Figure 4A). We further tested the effect of loss of *cep-1* by making double  
323 mutants with *cep-1(lg12501)*. Similar to the RNAi results, we observed that mutation  
324 of *cep-1* increased the fertility of *lin-13*, *let-418* and *hpl-2* mutants (Figure 4B). This  
325 increase is not due to a general effect of *cep-1* on fertility, as *cep-1* mutants have a  
326 slightly reduced brood size compared to wild-type animals (Figure 4B). We also  
327 observed that *cep-1* loss partially rescued the slow growth phenotype of the mutants  
328 (Figure 4C). These results suggest that genotoxic stress and DNA damage signalling  
329 in heterochromatin mutants activates p53, which contributes to sterility and slow  
330 growth. The increase in fertility upon *cep-1/p53* inhibition may be a direct  
331 consequence of reduced germ line apoptosis, or alternatively the effect may be  
332 indirect, by preventing DNA damage signalling or improving growth rate. We also



333 note that although fertility of heterochromatin mutants is increased when *cep-1/p53* is  
334 inhibited, it is not restored to wild-type levels indicating that other mechanisms  
335 contribute to sterility.

336

337 **SPO-11 induced endogenous DNA damage contributes to heterochromatin**  
338 **mutant sterility**

339 We next investigated whether endogenous physiological DNA damage may also  
340 contribute to heterochromatin mutant sterility. During meiosis, double strand breaks  
341 are induced by the topoisomerase-like protein SPO-11 to facilitate crossover  
342 formation and meiotic recombination (70). Similar to inhibition of damage induced  
343 cell death or MIRAGE1 expression, we found that inhibiting meiotic double strand  
344 breaks by RNAi of *spo-11* increased the brood size of *hpl-2*, *lin-13*, and *let-418*  
345 mutants (Figure 4A), suggesting that defects in repair of meiotic double strand breaks  
346 contributes to sterility.

347

348 **The piRNA pathway shows similarity in repeat regulation and functional**  
349 **connections to heterochromatin factors**

350 The piRNA pathway has a well-known role in preventing the activity of transposons  
351 in the germ line (34). In *C. elegans*, the piRNA pathway operates through the Piwi  
352 ArgonAUT protein PRG-1. Silencing occurs both transcriptionally, through  
353 engagement of the nuclear RNAi pathway, and post-transcriptionally, through a  
354 poorly understood mechanism. Interestingly, *prg-1* mutants have fertility defects,  
355 displaying a low brood size and a mortal germline phenotype that is more pronounced

356 at elevated temperatures (37, 38). The observation that heterochromatin mutants  
357 desilence repetitive elements together with the finding that HPL-2 and H3K9  
358 methyltransferase SET-25 are needed for piRNA pathway function in conjunction with  
359 the nuclear RNAi pathway (35) prompted us to further investigate connections  
360 between these factors.

361         We first assayed the expression of repetitive DNA in *prg-1* mutant adults  
362 because genome-wide profiling had not previously been done. We detected  
363 upregulation of 18 repetitive elements in *prg-1* mutants, 14 of which are also  
364 upregulated in at least one of the heterochromatin mutants, including MIRAGE1  
365 elements (Figure 6A, Figure 3-source data 1 and 2). RNA FISH experiments showed  
366 that MIRAGE1 RNA is increased in *prg-1* mutant germ lines, similar to observations  
367 in heterochromatin mutants described above (Figure 3E and Figure 3-figure  
368 supplement 3). Given this overlap in targets and the fertility defects of *prg-1* mutants,  
369 we assessed whether they also showed increased germ line apoptosis as seen in  
370 heterochromatin factor mutants. Indeed, we observed significantly increased germ  
371 cell death in *prg-1* mutant adults (Figure 6B). Therefore, the piRNA pathway and  
372 heterochromatin factors have shared targets and phenotypes, and likely collaborate in  
373 maintaining genomic integrity of the developing germline.

374         We next used a piRNA activity sensor to test whether heterochromatin factors  
375 other than *hpl-2* are needed for piRNA pathway function. Similar to *hpl-2* and *set-25*,  
376 we found that *lin-61* and *let-418* mutants derepress the piRNA sensor reporter (Figure  
377 6C, D). We also observed weak desilencing in a fraction of *met-2* mutants (Figure 6D),  
378 which was not observed in a previous assay (35). However, the piRNA sensor was  
379 not desilenced in *lin-13* mutants. It is possible that the lack of desilencing is due to

380 the *lin-13(n770)* allele being non-null, however this mutant does show defects such as  
381 upregulation of repetitive elements and increased apoptosis.

382 A previous study profiling small RNAs in *hpl-2* mutants in a piRNA sensor  
383 background showed that piRNAs targeting the sensor or a few endogenous targets  
384 were not altered in abundance, suggesting that *hpl-2* acts downstream of piRNA  
385 production (35). To investigate this further, we compared the global abundance of  
386 piRNAs in *hpl-2* and wild-type adults. Similar to the above results, we found that *hpl-*  
387 *2* mutants make normal levels of piRNAs (Figure 6-figure supplement 1). We also  
388 investigated the production of secondary 22G siRNAs in *hpl-2* mutants. We detected  
389 a decrease in 22G RNAs mapping near predicted piRNA target sites in *prg-1* mutants  
390 as previously observed (41), but levels were normal in *hpl-2* mutants (Figure 6-figure  
391 supplement 1). *hpl-2* mutants also showed normal levels of 22Gs at repeat elements.  
392 (Figure 6-figure supplement 1). Therefore, at least for *hpl-2*, the role in the piRNA  
393 pathway appears to be downstream of piRNA and subsequent 22G RNA synthesis.

394 To summarize, *hpl-2*, *lin-61*, *let-418*, *set-25*, and *met-2* are important for  
395 piRNA pathway function. Nevertheless, the widespread binding sites and desilencing  
396 of additional targets relative to *prg-1* indicate that heterochromatin proteins also  
397 mediate repression that is not piRNA-induced.

398

### 399 **Partial redundancy between *let-418/Mi-2* and the nuclear RNAi pathway**

400 The *C. elegans* nuclear RNAi pathway (called the nrde pathway) mediates  
401 transcriptional repression and directs H3K9me3 methylation to its targets (42, 44-47,  
402 50). The nrde pathway also functions in repression of piRNA targets (35). To

403 investigate the relationship between the *nrde* pathway, the piRNA pathway, and  
404 heterochromatin factors in repetitive element regulation, we carried out RNA-seq on  
405 *nrde-2(gg91)*, a putative null mutant, and compared results to those of  
406 heterochromatin and *prg-1* mutants. We observed that *nrde-2* mutants showed a larger  
407 and different spectrum of repetitive element desilencing compared to *prg-1* or any of  
408 the heterochromatin mutants (Figure 7-figure supplement 1, Figure 3-source data 1  
409 and 2). Of 71 elements desilenced in *nrde-2* mutants, only seven overlap a repeat  
410 desilenced in one of the heterochromatin mutant strains (Figure 7-figure supplement  
411 1). Notably MIRAGE1 elements, prominently upregulated in heterochromatin and  
412 *prg-1* mutants, are not desilenced in *nrde-2* mutants (Figure 3-source data 1 and 2;  
413 Figure 7-figure supplement 1). Retrotransposons are highly enriched among *nrde-2*  
414 targets (45/71) whereas heterochromatin factors and *prg-1* are more associated with  
415 DNA transposon misregulation (Figure 3B). Therefore, although the *nrde* pathway is  
416 required for aspects of piRNA function, repetitive element targets largely differ.  
417 Notably, the finding that elements derepressed in *nrde-2* mutants differ from those in  
418 *met-2 set-25* mutants, which lack detectable H3K9 methylation, suggests that H3K9  
419 methylation may not be required for *nrde* dependent repression.

420       Like the heterochromatin factor and *prg-1* mutants, *nrde-2* mutants also show  
421 a temperature sensitive decrease in fertility (42). To test whether the *nrde-2* fertility  
422 function had functional overlap with heterochromatin factors, we constructed double  
423 mutants between *nrde-2* and three mutants (*hpl-2*, *lin-61*, and *let-418*). We observed  
424 no reduction in fertility for *nrde-2; hpl-2*, and a weak but non-significant reduction for  
425 *nrde-2; lin-61* double mutants (Figure 7A). However, *nrde-2; let-418*, double mutants  
426 showed a significantly smaller brood size than expected compared to the single  
427 mutants, indicating partial functional redundancy between *let-418* and the *nrde*

428 pathway (Figure 7A). We also observed that all three double mutants showed  
429 significantly increased embryo lethality compared to the single mutants (Figure 7B).

430 To further investigate the genetic interaction between *nrde-2* and *let-418*, we  
431 carried out RNA-seq of *nrde-2; let-418* adults to test for redundancy in repeat element  
432 repression. We found that more repeats are upregulated in *nrde-2; let-418* double  
433 mutants compared to *nrde-2* or *let-418* single mutants (Figure 7B). Most of the repeat  
434 elements upregulated only in the *nrde-2; let-418* double mutant are retrotransposons  
435 (27/46; Figure 7B and Figure 3-source data 2). We conclude that NRDE-2 and LET-  
436 418 have unique and redundant roles in the repression of repetitive DNA elements.

437 Because a key output of the *nrde* pathway is the deposition of H3K9me3, the  
438 observed redundancy between NRDE-2 and LET-418 prompted us to investigate  
439 whether the *nrde* pathway might control H3K9me3 levels at heterochromatin  
440 regulated loci. To this end, we used published H3K9me3 ChIP-seq datasets in four  
441 different *nrde* mutants (*hrde-1*, *nrde-2*, *nrde-3*, and *nrde-4*; 44, 47, 51). and analysed  
442 levels at genes and repeats upregulated in *nrde-2* mutants or only in heterochromatin  
443 mutants. The *nrde* pathway acts in the germ line and soma: HRDE-1 and NRDE-3 are  
444 argonautes specific for germ line or soma, respectively, whereas NRDE-2 and NRDE-  
445 4 act in all tissues (42, 46, 47, 50). We observed that repeat elements and genes  
446 upregulated in *nrde-2* mutants also have reduced H3K9me3 levels, supporting the link  
447 between H3K9me3 methylation and repression of endogenous targets (Figure 7-figure  
448 supplements 2 and 3). H3K9me3 was also reduced on *nrde-2* upregulated elements in  
449 mutants of other *nrde* genes that act in the germ line (*hrde-1* and *nrde-4*), but not in  
450 the soma specific argonaute mutant *nrde-3* (Figure 7-figure supplements 2 and 3).  
451 This suggests that the transcriptional upregulation observed in *nrde-2* mutants occurs  
452 largely in the germ line.

453           We next analysed H3K9me3 levels in sets of genes and repeats upregulated in  
454 heterochromatin mutant strains but not in *nrde-2* mutants to ask if these elements  
455 were also under *nrde* control. Indeed, genes upregulated in any of the five  
456 heterochromatin factor mutant strains (*hpl-2*, *lin-13*, *let-418*, *lin-61*, *met-2 set-25*) but  
457 not in *nrde-2* mutants also showed reduced H3K9me3 in germ line *nrde* mutants,  
458 though the reduction was weaker than for *nrde-2* regulated genes (Figure 7-figure  
459 supplement 3). Repeats upregulated only in heterochromatin factor mutants showed a  
460 trend of reduced H3K9me3 (Figure 7-figure supplement 2). Therefore, the germ line  
461 nuclear RNAi pathway partially controls H3K9me3 levels at loci regulated by  
462 heterochromatin factors. Because these elements are not upregulated in *nrde-2*  
463 mutants, this indicates that the observed reduction of H3K9me3 is not sufficient for  
464 derepression and supports partial redundancy between the *nrde* pathway and  
465 heterochromatin factors in repeat silencing.

466

## 467 **Discussion**

468 All animal genomes contain abundant repetitive elements, which are subject to  
469 silencing control. This study expands our knowledge of repetitive element silencing  
470 by showing that a diverse set of heterochromatin factors (HPL-2/HP1, LIN-61, LET-  
471 418/Mi-2, LIN-13, and MET-2) work together with the piRNA and nuclear RNAi  
472 pathways to silence repetitive elements such as DNA transposons and  
473 retrotransposons. The systematic analyses of multiple factors, most of which are  
474 conserved, uncovered a network of functional interactions between them. We suggest  
475 that the interactions we identify here are likely to be relevant to the control of  
476 repetitive elements in other animals.

477 All factors and pathways studied are individually important for germ line  
478 function, as evidenced by reduced fertility or sterility of single mutants, and all are  
479 individually necessary for repetitive element silencing. Importantly, functional  
480 redundancy among the factors and pathways demonstrates widespread safeguards for  
481 ensuring germ line health and fertility. Our results show that there are interacting and  
482 overlapping mechanisms of repeat element silencing (Figure 8A).

483

## 484 **Heterochromatin factors and small RNA pathways**

485 Connections between heterochromatin formation and transcriptional silencing  
486 via RNAi mechanisms involving small RNAs have been observed in a variety of  
487 organisms (71, 72). For instance, RNAi machinery directs silencing at repetitive  
488 centromeric regions in *S. pombe* in a process that involves H3K9 methylation and  
489 chromodomain proteins that are similar to HP1. Likewise, in *Arabidopsis* and other

490 eukaryotes, repetitive elements have been shown to be repressed in chromatin by the  
491 action of nuclear pathways involving small RNAs and the targeting of H3K9  
492 methylation. These pathways have also been implicated in gene silencing. However  
493 the mechanisms linking these silencing pathways are not fully understood and it is  
494 clear that factors involved in heterochromatin formation and function remain to be  
495 identified. For example a recent study of HP1a interactors in *Drosophila* identified  
496 many new factors needed for gene silencing and/or heterochromatin organization (73)

497       Previous studies in *C. elegans* have also uncovered connections between  
498 heterochromatin factors and small RNA pathways. The piRNA pathway is a small  
499 RNA pathway active in the germ line that silences transposons and genes through  
500 cytoplasmic and nuclear mechanisms (34). In the nucleus, the piRNA pathway  
501 engages the nrde pathway and heterochromatin factors for transcriptional repression:  
502 HPL-2, the H3K9me3 histone methyltransferase SET-25, and nuclear RNAi factors  
503 are necessary for silencing a piRNA pathway sensor (35). The nrde pathway directs  
504 H3K9me3 both endogenously and in response to exogenous dsRNA and effects  
505 transcriptional repression in both the germ line and soma (42, 44, 46, 50).  
506 Endogenous germ line nrde targets have been suggested to include retrotransposons  
507 based on their enrichment at genomic intervals with increased expression and  
508 decreased H3K9me3 levels in germ line nuclear RNAi mutants (51). Here, through  
509 genetic and profiling analyses, we have established additional connections between  
510 heterochromatin factors and small RNA pathways, linking them to repetitive element  
511 repression, uncovering functional redundancy, and expanding understanding of their  
512 relationships.

513

514 **Heterochromatin factors associate with and repress repetitive elements**



515           We found that the genome-wide distributions of each of the five  
516 heterochromatin factors studied here (HPL-2/HP1, LIN-13, LIN-61, LET-418/Mi-2,  
517 and MET-2/SETDB1) are highly correlated with each other and strongly associated  
518 with repetitive elements. These patterns are correlated with H3K9me2, but not with  
519 H3K9me3, as previously seen for HPL-2 in embryos (14). H3K9me2 and H3K9me3  
520 modifications largely do not overlap (this study and (2)), but both are associated with  
521 repetitive elements. We further found that H3K9me2, but not H3K9me3 is enriched at  
522 telomeres. These patterns support functional differences between H3K9me2 and  
523 H3K9me3.

524           In addition to the similarity in binding profiles, we found that *hpl-2*, *lin-13*,  
525 *lin-61*, *let-418*, and *met-2 set-25* mutant strains all showed derepression of repetitive  
526 elements and genes. While this paper was under review, Zeller et al reported that *met-*  
527 *2 set-25* mutants derepressed transposable element expression in embryos and gonads,  
528 similar to the results presented here for *met-2 set-25* young adults (74). The global  
529 loss of H3K9 methylation also leads to transposon derepression and mobilization in  
530 *Drosophila* (75). The patterns of upregulated repetitive elements and genes among  
531 the five heterochromatin mutant strains are strikingly similar, indicating shared targets.  
532 However, although binding profiles and consequences of loss are similar, the factors  
533 also have unique roles. Furthermore, genetic interactions between all pairs show that  
534 they have partially redundant functions. To understand these relationships, it will be  
535 important to investigate their interdependencies and the consequences of inactivating  
536 multiple factors together.

537

538 **Relationships between heterochromatin factors and small RNA pathways**

539 Comparing expression profiles of heterochromatin mutants to those of *prg-1* (piRNA  
540 pathway) and *nrde-2* (nuclear RNAi pathway) mutants, we observed that repeat  
541 elements and genes have similar patterns of derepression in heterochromatin factor  
542 and *prg-1* mutants, but these largely differ from those in *nrde-2* mutants. Consistent  
543 with a functional link between the heterochromatin factors and the piRNA pathway, a  
544 previous study showed that HPL-2 and SET-25 are needed for piRNA pathway  
545 function (35). Here we further found that LIN-61, LET-418, and MET-2 (weakly) are  
546 also important. It appears that heterochromatin proteins act as downstream effectors  
547 of the piRNA pathway rather than having a role in small RNA biogenesis or stability  
548 since levels of piRNAs and their secondary 22G RNAs are normal in *hpl-2* mutants  
549 (35) (and this study). Investigating whether small RNA populations are altered in  
550 other heterochromatin mutants will be needed to confirm this hypothesis. This  
551 mechanism appears to differ from the situation in *S. pombe*, where H3K9 methylation  
552 and chromodomain proteins are required for association of silencing complexes that  
553 generate siRNAs (72, 76, 77). However, it is possible that redundancy between  
554 heterochromatin factors in *C. elegans* may have masked involvement in small RNA  
555 production.

556 Many more elements are desilenced in *nrde-2* mutants than in *prg-1* mutants,  
557 with little overlap between the two. The elements derepressed in *nrde-2* mutants are  
558 mostly LTR retrotransposons, in line with a study finding transcriptionally  
559 upregulated genomic intervals in *hrde-1* mutants to be enriched for LTRs and  
560 unaffected in *prg-1* mutants (51). The apparent difference in targets between NRDE-  
561 2 and PRG-1 could be due to the requirement for PRG-1 in initiation but not  
562 maintenance of silencing. Once silencing is established by PRG-1, nuclear RNAi  
563 maintains silencing in a process termed RNAe that depends on continued generation

564 of secondary siRNAs by mutator proteins, the presence of secondary siRNA-  
565 associated argonautes (including *nrde-2*), and maintenance of the established  
566 chromatin state by heterochromatin factors (35, 39-41, 78).

567 Our study also uncovered interactions between heterochromatin factors and  
568 the nuclear RNAi pathway. We found that *let-418; nrde-2* double mutants show a  
569 strongly enhanced fertility defect compared to the single mutants, and that they  
570 desilence a larger set and a wider spectrum of repetitive elements. Therefore, for some  
571 elements, either LET-418 or NRDE-2 is sufficient for silencing, demonstrating  
572 redundancy in repetitive element silencing. These interactions further emphasize the  
573 overlapping safeguards that function to effectively repress repetitive elements. The  
574 increased embryo lethality seen in double mutants between *nrde-2* and three tested  
575 heterochromatin factors (*hpl-2*, *lin-61*, or *let-418*) suggest additional as yet  
576 unexplored redundancy between the nuclear RNAi pathway and heterochromatin  
577 factors. That a substantial number of repetitive elements are desilenced in  
578 heterochromatin factor mutants but not in *prg-1* or *nrde-2* mutants suggests that  
579 heterochromatin factors can also act as independent agents, silencing repetitive  
580 elements independently of small RNA pathways.

581 Interestingly, genes and repeats upregulated in *nrde-2* mutants more often  
582 have high levels of H3K9me3 than H3K9me2 whereas those upregulated in *met-2 set-*  
583 *25* mutants (which lack all H3K9 methylation) show the opposite pattern and more  
584 often have high H3K9me2 marking (Figure 3-figure supplement 2). The association  
585 between H3K9me3 and *nrde-2* upregulated genes suggests that the nuclear RNAi  
586 pathway may specifically engage this modification. Consistent with this, repeats and  
587 genes upregulated in *nrde-2* mutants have strongly reduced H3K9me3 levels in germ  
588 line nuclear RNAi pathway mutants. However, the difference in elements desilenced

589 in *nrde-2* and *met-2 set-25* mutants (which lack H3K9 methylation) argues against an  
590 essential requirement for H3K9 methylation in *nrde* mediated repression. We  
591 observed that H3K9me3 levels in *nrde-2* and other germline nuclear RNAi mutants  
592 are also weakly reduced at genes and repeats repressed by heterochromatin pathway  
593 factors, even though these elements are not upregulated in *nrde-2* mutants. This  
594 suggests that the heterochromatin factors and the nuclear RNAi pathway may regulate  
595 many common elements, but that heterochromatin factors can still effectively silence  
596 them in the absence of the nuclear RNAi pathway. Future analyses in mutants  
597 compromised for both nuclear RNAi and heterochromatin factors will be needed to  
598 address the mechanisms of this redundancy.

599

#### 600 **Heterochromatin factors may act locally within euchromatic domains**

601 We speculate that in many cases, repetitive element regulation involves a local  
602 mechanism rather than the spreading of large heterochromatin domains. First, we  
603 observe that heterochromatin factor binding is often closely associated with repetitive  
604 elements and does not extend to adjacent genes. Second, genes containing repetitive  
605 elements bound by heterochromatin factors (usually within introns) are often  
606 expressed. Indeed, one fourth of genes contain a repetitive element bound by a  
607 heterochromatin factor, and of those, 59% (3287/5568) are expressed in the germ line.  
608 Formation of a large inactive heterochromatin domain would clearly be incompatible  
609 with such widespread germ line expression.

610 In *C. elegans*, most H3K9 marking occurs on the distal chromosome arms,  
611 where small regions of H3K9 are interspersed with chromatin typical of euchromatin  
612 (2). Many active genes, including those expressed in the germ line, reside in these

613 arm regions (2). Intriguingly, the repeat- and H3K9-rich chromosome arms are  
614 generally associated with the nuclear lamina, a region implicated in transcriptional  
615 repression (3, 79). Active genes at the periphery that contain repetitive elements  
616 bound by heterochromatin factors may be subject to special mechanisms for their  
617 expression.

618

### 619 **Heterochromatin factors and DNA repair**

620 In addition to functioning in repetitive element repression, some of the  
621 heterochromatin factors we studied here are implicated in DNA repair or genome  
622 stability. We found that *hpl-2* mutant germ lines show reduced repair and increased  
623 activation of DNA damage signaling in response to ionizing radiation. LIN-61 is  
624 needed for DNA repair in the germ line and its loss causes an increase in the germ  
625 line mutation rate (62, 63). Additionally, both *lin-61* and *set-25* were identified in a  
626 genome-wide RNAi screen for genes needed for genome stability in the soma (63).  
627 Furthermore, *met-2 set-25* mutants, which lack all H3K9methylation, were recently  
628 shown to have increased sensitivity to replication stress and increased rates of repeat  
629 associated mutations and R loops (74). In mammalian cells, orthologs of LET-418  
630 (Mi-2), HPL-2 (HP1), and MET-2 (SETDB1), have documented roles in DNA repair  
631 (80-82). Mi-2 is needed for recruitment of DNA repair proteins to sites of DSBs, and  
632 loss of Mi-2 from human fibroblast cell lines leads to apoptosis and sensitivity to  
633 ionizing radiation (83-85). HP1 accumulates at DSBs and its depletion causes  
634 abnormal recruitment of repair factors (86). Additionally, DNA damage repair defects  
635 caused by depletion of SETDB1 are similar to those seen upon loss of HP1 (80).  
636 Defects in repair of DNA lesions are likely to cause germ line stress and to contribute

637 to the germ line instability, germ line development defects, and increased germ line  
638 apoptosis seen in heterochromatin factor mutants. Such processes might also underlie  
639 the reduced fertility and increased germ line apoptosis seen in *prg-1* mutants.

640         The activation of MIRAGE1 DNA transposases in all heterochromatin factor  
641 mutant strains and *prg-1* mutants would be expected to cause double strand breaks  
642 and/or replication stress. We show that this abnormal expression contributes to  
643 sterility because fertility was partially restored in *hpl-2*, *let-418*, and *lin-13* mutants  
644 when MIRAGE1 transcripts were knocked down via RNAi. Similarly, inhibiting  
645 endogenous meiotic double strand breaks by knockdown of *spo-11* also partially  
646 restored fertility. These results suggest that heterochromatin factors act to combat  
647 different types of genotoxic insults, both through silencing repetitive elements and  
648 facilitating repair. If not dealt with, these insults cause sterility (Figure 8B).

649         We also observed that loss of *cep-1/p53* suppressed heterochromatin factor  
650 defects. p53 is important for mediating DNA damage signaling (87). In *C. elegans*,  
651 p53/*cep-1* is required for damage induced germ cell death (67, 68). In the soma, DNA  
652 damage signaling does not lead to p53/CEP-1-mediated apoptosis; however, CEP-1  
653 does play a role in DNA repair in the soma, and it slows larval development in  
654 response to loss of CLK-2/TEL2 DNA damage signaling (88, 89). Our findings that  
655 loss of *cep-1* partially suppresses the sterility and slow growth phenotypes of *hpl-2*,  
656 *lin-13*, and *let-418* suggests that activation of damage signaling and *cep-1/p53*  
657 underlies these defects.

658         Interestingly, none of the heterochromatin mutant strains studied here display  
659 hallmarks of mutators such as high embryo lethality or the frequent production of  
660 progeny with visible mutant phenotypes. We propose that quality control mechanisms

661 in the germ lines of heterochromatin factor mutants largely prevent improperly  
662 repaired meiotic germ cells from becoming mature gametes, either through apoptosis  
663 or the arrest of gametogenesis, to ensure that mutation rates are low.

664

## 665 **Conclusions**

666 This study indicates a complex orchestration of fertility protection by HPL-2/HP1,  
667 LIN-13, LIN-61, MET-2, and LET-418/Mi-2 together with the piRNA and nuclear  
668 RNAi pathways. Repression of repetitive elements may prevent replication stress and  
669 DNA damage, but when damage does occur, these heterochromatin proteins  
670 participate in repair pathways to maintain genome integrity. Further work will be  
671 required to untangle the mechanisms and individual roles in DNA repair pathways  
672 and repetitive element repression.

673 **Methods**

674 **Worm culture and strains**

675 Strains were cultured using standard methods (Brenner, 1974). Strains used in the  
676 paper are given in Supplementary file 2. Whole genome sequencing of PFR40 *hpl-*  
677 *2(tm1489)* identified an 882bp deletion in the *polq-1* gene at chrIII:5792238-5793119.  
678 The underlined T residue marks the junction of the deletion and matches the flanking  
679 sequence of both sides of the deletion:  
680 TAAATCTCTATCCGATGTGATTCCACGTCGATAACATTATTC; we have named  
681 this lesion *polq-1(we100)*. The JA1902 strain harboring *hpl-2(tm1489)* but lacking  
682 *polq-1(we100)* was derived by outcrossing MT15062 *hpl-2(tm1489);hpl-1(n4317)*,  
683 which does not contain *polq-1(we100)*.

684

685 **ChIP-seq**

686 Wild-type young adults (YA) were prepared by growing synchronized L1s in liquid  
687 culture using standard S-basal medium with HB101 E. coli for 60 hours at 20°C.  
688 Adults were sucrose floated, washed in PBS, and flash frozen in liquid nitrogen.  
689 Extract preparation and chromatin immunoprecipitation were performed as in (90)  
690 with the following modifications: tissue was fixed for 10 minutes in 1.5 mM EGS  
691 (Pierce 21565) then formaldehyde added to 1% for a further 10 minutes before  
692 quenching with 0.125M glycine and washing 2X with PBS plus protease inhibitors.  
693 Pellets were washed once in FA buffer, then resuspended in 1ml FA buffer per 1 mL  
694 of ground worm powder and the extract sonicated to an average size of 250 base pairs  
695 with a Diagenode Bioruptor or Bioruptor Pico for 28 pulses of 30 seconds followed



696 by 30 seconds pause. Antibodies used for ChIP are given in Supplementary file 3.  
697 Following ChIP and DNA purification, libraries were prepared using the Illumina  
698 TruSeq kit. Fragments in the 250-300 base pair range were selected using Agencourt  
699 AMPure XP beads. Two biological replicate ChIPs were conducted for each factor.

700

## 701 **RNA-seq**

702 Synchronized, starved L1 stage worms were grown on NGM plates at either 15°C  
703 (*lin-13, prg-1, nrde-2, nrde-2; let-418*, and N2) or 20°C (*hpl-2, let-418, lin-61, met-2*  
704 *set-25*, and N2) until the L4 stage and then shifted to 25°C for 15-18 hours until they  
705 reached young adult stage. Worms were washed off plates at the young adult stage,  
706 flash frozen in liquid nitrogen, and stored at -80°C until use. RNA was extracted  
707 from frozen worms using TriPure (Roche). RNA was purified with Zymo Research  
708 RNA Clean and Concentrator-5 (Cambridge Bioscience) following DNase I digestion.  
709 Ribosomal RNA was depleted using Ribo-Zero rRNA Removal Kit  
710 (Human/Mouse/Rat) (Illumina). Libraries were prepared using the NEBNext Ultra  
711 Directional RNA Library Prep Kit for Illumina (New England Biolabs). Two  
712 biological replicates were prepared for each strain.

713

## 714 **Data Processing**

715 ChIP-seq and RNA-seq libraries were sequenced using Illumina HiSeq. Reads were  
716 aligned to the WS220/ce10 assembly of the *C. elegans* genome using BWA v. 0.7.7  
717 (91) with default settings (BWA-backtrack algorithm). The SAMtools v. 0.1.19 ‘view’  
718 utility was used to convert the alignments to BAM format. To be able to investigate

719 binding and expression at repetitive elements, we used all aligned reads (mapq0) to  
720 generate pileup and normalised tracks. Normalized ChIP-seq coverage tracks were  
721 generated using the BEADS algorithm (92) without the mappability correction step.  
722 ChIP-seq and RNA-seq library read numbers and alignment statistics are given in  
723 Figure 2-source data 3.

724

### 725 **Peak calls**

726 Broad and sharp ChIP-seq peaks were generated as follows. Initial ChIP-seq peaks  
727 were called using MACS v. 2.1.1 (93) with a permissive 0.7 q-value cutoff and  
728 fragment size of 150bp against a summed ChIP-seq input. These were used in  
729 conjunction with a modified IDR procedure to generate broad peak calls ((94);  
730 <https://www.encodeproject.org/software/idr/>) with an IDR threshold of 0.05 to  
731 combine replicates. These broad peaks are termed “IDR peaks” (Figure 2-source data  
732 1). The pipeline for generating IDR peaks is available here:

733 [https://github.com/Przemol/biokludge/blob/master/mac2\\_idr/mac2\\_idr.ipynb](https://github.com/Przemol/biokludge/blob/master/mac2_idr/mac2_idr.ipynb). To  
734 generate sharp peak calls, the IDR calls were further refined using an adhoc post-  
735 processing step, as visually distinct peaks close to each other were often contained  
736 within single broad peaks. We identified concave regions within the IDR peaks using  
737 the smoothed second derivative of the mapq0 pileup coverage signal with 250bp  
738 kernel

739 ([https://github.com/Przemol/biokludge/blob/master/mac2\\_idr/concave\\_regions.py](https://github.com/Przemol/biokludge/blob/master/mac2_idr/concave_regions.py)).

740 We empirically found the minimum of the second derivative within a concave region  
741 to be a good indicator of a visually compelling peak, and used concave regions  
742 (within IDR peaks) with a threshold of lower than -500 curvature index. Next, we

743 discarded peaks with MASC2 score lower than 100 and peak width lower than 100bp.  
744 The resulting peaks were filtered against combined ENCODE  
745 (<http://www.broadinstitute.org/~anshul/projects/worm/blacklist/ce10-blacklist.bed.gz>)  
746 and in-house blacklist  
747 (<https://gist.github.com/przemol/8a712a2e840f95237f4a4f322f65bee1>) to generate  
748 our final sharp peak calls, described as “concave peaks.” We created a summary peak  
749 call super set by creating a union of the five heterochromatin factor concave peak  
750 calls. We termed this set “Any5” (n=33301; Figure 2-source data 1). Each Any5  
751 region was then annotated for overlap with each factor. Venn diagrams were plotted  
752 using VennDiagram R package (95), and UpSet plots were generated as described in  
753 (96). For determination of factors bound to repeats, we used broad IDR peak calls  
754 since repeats usually display a pattern of broad factor binding. Broad IDR peaks were  
755 used in Figure 3-figure supplement 2.

756

### 757 **Differential expression analyses of genes**

758 We built an exon model based on Ensembl Gene 77 (Nov 2014) database gene  
759 annotation lifted over to ce10/WS220. Tag counts for each gene were extracted from  
760 BAM alignment files using HTSeq method working in union mode and implemented  
761 in R. These values were used to build an expression matrix. Differential gene  
762 expression between N2 and mutant backgrounds was tested using DESeq2; mutants  
763 were compared to their temperature matched control N2 replicates (97). Reads per  
764 kilobase of exon model per million mapped reads (RPKM) normalized expression  
765 values were generated using the median ratio method (Equation 5 in Anders and  
766 Huber, 2010). RPKM values, maximum posterior estimates of log<sub>2</sub> FC (LFC) and

767 statistical significance estimates for each gene is in Figure 3-source data 3. We used a  
768 false discovery rate (FDR)  $< 0.01$  and LFC  $> 1$  to call genes up-regulated, and FDR  $<$   
769  $0.01$  and LFC  $< -1$  to call genes down-regulated. To avoid small differences in  
770 developmental stages from contributing to apparent gene expression differences, we  
771 also excluded genes whose wild-type expression oscillates repeatedly during  
772 development (Supplemental Table S7 in(98)).

773

#### 774 **Differential expression analyses of repeats**

775 We built a repeat element model based on Dfam 2.0 ((57), downloaded Sept 2015  
776 from <http://dfam.org/>). The model contained 62331 individual repeats divided into  
777 184 families. Since individual repeats did not had unique identifiers (UID), we named  
778 them based on genomic position in “chromosome:start-end” convention, e.g.  
779 “chrI:10773-11032”. Tag counts for each repeat were extracted from BAM alignment  
780 files using HTSeq method working in union mode and implemented in R. These  
781 values were used to build expression matrixes. Differential repeat expression between  
782 N2 and mutant backgrounds was tested using DESeq2 as described above for genes.  
783 A table containing RPKM values, maximum posterior estimates of log<sub>2</sub> FC (LFC)  
784 and statistical significance estimates for each repeat is available in Figure 3-source  
785 data 1. Upregulated repeats were defined as those with a false discovery rate (FDR)  $<$   
786  $0.01$ , and LFC  $> 0$ . In addition, repeats that overlapped a gene upregulated in the  
787 matched mutant background were filtered out. For purpose of filtering, differentially  
788 expressed genes were defined with more permissive cutoffs: FDR  $< 0.05$  and LFC  $>$   
789  $0$ .

790 To assess expression of individual repeats scored as upregulated above, we  
791 counted uniquely mapping reads, defined as having a BWA mapping quality over 10.  
792 Elements with >10 unique reads and fold-change >1.5 were considered upregulated,  
793 which applied to 61 of 71 elements upregulated in any of the heterochromatin factor  
794 mutant strains. The remaining 10 elements had insufficient uniquely mapping reads  
795 for assessment.

796

### 797 **Telomere enrichment**

798 Telomere enrichment for ChIP-seq factors were determined by counting reads with  
799 the telomere sequence “GCCTAA”. Reads were extracted from BAM files (including  
800 non- aligned reads) and trimmed to 36bp. Then the number of “GCCTAA” motifs was  
801 counted for each read using Biostrings R package. Telomeric reads were defined as  
802 those having 5 or 6 “GCCTAA” motifs in 36bp. To assess the statistical significance  
803 of enrichment we used one sided Mann–Whitney U test (2 replicates for each factor  
804 vs. input background of 129 experiments) and reported the p-values.

805

### 806 **small RNA analyses**

807 The following small RNA datasets from (35) were used: *prg-1* (GSM708661), WT  
808 matching *prg-1* (GSM708660), *hpl-2* (GSM950181), WT matching *hpl-2*  
809 (GSM950180), *nrde-2* (GSM950179), WT matching *nrde-2* (GSM950178). Uniquely  
810 matching positions in each dataset were determined and the smallest number (530039,  
811 in the *prg-1* dataset) subsampled from each. piRNA number was then determined by  
812 calculating the number matching the piRNAs annotated in (38) or (34) (n=27884

813 piRNAs). piRNA targets were determined as in (41), requiring a perfect match and no  
814 more than one G:U pair in the seed region (nt 2–8), and allowing up to two  
815 mismatches and an additional G:U pair outside of the seed region, excluding self hits  
816 (n=391173). piRNA dependent 22Gs were also defined as in (41), as 22G RNAs that  
817 mapped in 100bp windows centered at piRNA target sites, allowing zero or one  
818 mismatch.

819

### 820 **H3K9me3 levels in nrde mutants**

821 The following H3K9me3 ChIP seq datasets were used: *nrde-2* (GSM855086), *nrde-3*  
822 (GSM932875), *nrde-4* (GSM932876), WT for *nrde-2*, *-3*, *-4* (GSM855085), *hrde-1*  
823 (GSM1399632), and WT for *hrde-1* (GSM1399631) from (44, 47, 51). Datasets were  
824 processed as described in the data processing section above. The average signal in  
825 each region of interest was calculated and the H3K9me3 fold change was calculated  
826 relative to the matched wild-type dataset. Control repeats (n=612) have >1.5-fold  
827 H3K9me3 levels relative to the genome average, have <1-fold signal for each of the  
828 five heterochromatin factors (HPL-2, LIN-13, LIN-61, LET-418 and MET-2) relative  
829 to the genome average, and are not upregulated in any of the five mutant strains. A  
830 reduction of H3K9me3 at gene and repeat sets of interest was assessed by comparing  
831 to all genes or all repeats using a single-sided Mann-Whitney U test.

832

### 833 **Detection of phospho-CHEK-1**

834 N2 and *hpl-2* adults grown at 25°C were irradiated at 0, 20, and 100 Gy and recovered  
835 for one hour at 25°C. One hour post irradiation, gonads were dissected in 8 µL M9 on  
836 slides and freeze-cracked. Gonads were fixed four minutes in 100 % methanol

837 followed by twenty minutes in 4 % formaldehyde in 1 X PBS. After fixation, gonads  
838 were washed two times for ten minutes in 1 X PBS + 0.2 % Tween-20 (PBST),  
839 blocked for one hour at room temperature in 1 % milk in PBST, washed two times for  
840 ten minutes in PBST, incubated overnight at 4 °C in primary antibody diluted in  
841 PBST (1:50 rabbit monoclonal  $\alpha$ -phospho-CHK-1, Ser345, 133D, Cell Signalling  
842 Technologies, catalogue #2348), washed two times for ten minutes in PBST,  
843 incubated 2 hr with secondary antibody (Molecular Probes) and DAPI. Gonads were  
844 scored for the presence of phospho-CHK-1 staining using a Zeiss 510 Meta scanning-  
845 laser confocal microscope. Counts from individual experiments were pooled to give  
846 overall totals, and a two-tailed proportions Z test was used to determine whether there  
847 was a difference between N2 and *hpl-2* worms at a specific condition.

848

#### 849 **Oocyte Chromatin Fragmentation Assay**

850 L4 N2 and *hpl-2(tm1489)* grown at 20°C were irradiated at 0, 50, and 100 Gy,  
851 recovered for 24 hours at 20°C, then fixed in MeOH and DAPI stained. Slides were  
852 scored for the number of DAPI bodies in diakinesis oocytes. Oocytes with six DAPI  
853 bodies, representing the six bivalent chromosomes, were considered normal; oocytes  
854 with other numbers of DAPI bodies, representing chromosome fracturing or clumping,  
855 were considered fractured. To determine whether the proportion of oocytes with  
856 fractured chromosomes was different between N2 and *hpl-2(tm1489)* worms at a  
857 particular condition, a two-tailed proportions Z test was used. Two-tailed P values  
858 were calculated using a Z score table.

859

#### 860 **Germ line apoptosis measurements**

861 *bcIs39 (Plim7::ced-1::GFP)* expressed in gonadal sheath cells, was used to count  
862 engulfed germ line corpses (69). Strains containing *bcIs39* in wild type and mutant  
863 backgrounds were maintained at 20°C. L4s of each genotype were picked and 48  
864 hours later scored for the number of engulfed apoptotic cells in the gonad. A  
865 minimum of 25 gonads per experiment were scored in three independent experiments.  
866 The number of apoptotic cells in the germ line observed with the *ced-1::GFP* is higher  
867 than the number stained by vital dye or visualized by Nomarski optics because the  
868 reporter also marks cells at earlier stages of apoptosis than can be detected by other  
869 methods (99, 100). In *lin-13*, *hpl-2*, and *met-2 set-25* strains, full or partial silencing  
870 of the GFP transgene reporter occurred in some individuals. These animals were  
871 excluded because it was not possible to count cell deaths. Statistical significance was  
872 scored using a Mann-Whitney non-parametric test over all the datapoints combined.

873

#### 874 **Assessment of abnormal oogenesis**

875 Strains were maintained at 20°C and shifted to 25°C at the L4 stage. Adult germlines  
876 were imaged 48 hours later by mounting animals on 3% agarose pads in 5 mM  
877 Tetramisole, using a Zeiss widefield upright microscope using Nomarski optics.  
878 Oogenesis was deemed ‘abnormal’ if oocytes appeared small and rounded, if they  
879 were disorganized, or if their cytoplasm had taken on a pronounced curdled texture.  
880 Germlines which had mostly or fully disintegrated, and lacked detectable oocytes,  
881 were also quantified.

882

#### 883 **Sterility interaction tests**



884 Fertility interactions among heterochromatin factors were tested as follows: N2, *let-*  
885 *418(n3536)*, and *lin-13(n770)* were maintained at 20°C. Worms were fed at 20°C  
886 from the L4 stage for the following RNAi clones from (101): *hpl-2* (K01G5.2), *met-2*  
887 (R05D3.11), and *lin-61* (R06C7.7) or from starved L1s for *lin-13* (sjj2\_C03B8.4).  
888 RNAi plates were prepared as in (102). Progeny of fed L4s or the fed L1 were singled  
889 out onto fresh RNAi plates as L4s and total broods assessed by transferring the worms  
890 to new plates every day until they stopped laying eggs. Two independent experiments  
891 were conducted, with 3-8 total broods counted for each strain/RNAi combination.  
892 Three double mutant combinations were also constructed and tested: *lin-61(tm2649)*;  
893 *lin-13(n770)*, *lin-61(tm2649); hpl-2(tm1489)*, and *hpl-2(tm1489); let-418(n3536)*.  
894 Wild-type N2, single mutants, and double mutant strains were maintained at 20°C and  
895 total broods counted.

896 Fertility interactions between *nrde-2* and *let-418*, *hpl-2*, or *lin-61* were tested  
897 as follows. Wild-type, single mutants, and double mutants were grown at 15°C from  
898 starved L1 until the L3 stage, then transferred to 25°C. Total brood size per worm was  
899 determined for 12-24 worms per strain across two independent experiments.  
900 Genotypes of strains are given in Supplementary file 2.

901 Statistical tests for the above genetic interactions were conducted as follows:  
902 Under the null hypothesis that the two genes do not interact to affect fertility, the  
903 expected brood size of double mutant (or RNAi knockdown in a single mutant  
904 background) is the product of those of the single mutants (or that of the single mutant  
905 and the RNAi knockdown in a wild type background) divided by the brood size of the  
906 wild-type (or of the wild-type strain grown on control (empty vector) RNAi plates).  
907 Similar to (103), a t-test was used to test if the observed brood size of double mutants

908 (or RNAi knockdown in a single mutant background) equals the expected brood size  
909 under the null hypothesis.

910 Tests for suppression of sterility of *hpl-2(tm1489)*, *lin-13(n770)*, and *let-*  
911 *418(n3536)* mutants were conducted mutants as follows. The three strains show  
912 temperature sensitive sterility. Strains were maintained at 20°C, a temperature at  
913 which they are fertile, and starved L1s prepared by bleaching adults to collect  
914 embryos and hatching them in M9 buffer for 24 hrs at 20°C. Starved L1s were  
915 spotted onto RNAi plates prepared as in (102). They were then grown under  
916 conditions at which the mutant strain is nearly sterile: *hpl-2* was incubated at 24°C or  
917 25°C, *lin-13* was incubated at 24°C, and *let-418* was incubated for 7.5hrs at 20°C,  
918 then shifted to 24°C. After three days, the number of progeny produced by these L1s  
919 was counted. RNAi plates were prepared as in (102). The following RNAi clones  
920 were from (101): *cep-1* (F52B5.5), *spo-11* (T05E11.4), *mirage-A* (K02E7.2 +  
921 K02E7.3), *mirage-B* (W03G1.3 + W03G1.4). For each combination of mutant strain  
922 and target gene to knockdown, a paired t-test was used to compare the average  
923 number of progeny per parent from gene-targeting RNAi plates and matched empty  
924 vector plates incubated under the same condition.

925 Brood sizes of *cep-1(lg12501); hpl-2(tm1489)*, *cep-1(lg12501);let-418(n3536)*  
926 and *cep-1(lg12501);lin-13(n770)* double mutants were compared to wild-type and  
927 single mutants. Adults raised at 15°C were bleached to obtain embryos and left at  
928 20°C to hatch without food to obtain starved L1s. The starved L1s were fed with  
929 OP50 bacteria and immediately shifted to 25°C (for *hpl-2* tests) or fed at 20°C for 7.5  
930 hrs before shifting to 25°C (for *let-418* and *lin-13* tests). Experiments were repeated at  
931 least twice and total brood sizes were determined for 8 to 40 worms per strain. L1s  
932 prepared in the same way were used for growth rate tests, counting the number of

933 adults, L4s, or worms younger than L4 (indicated <L4) after approximately 48 hrs  
934 post feeding. A single sided t-test was used to test whether the brood size of the *cep-1*  
935 double mutant is larger than that of the single heterochromatin mutant.

936

### 937 **piRNA sensor expression**

938 *mjIs144* [*mex-5p::HIS-58::GFP::piRNA(21UR-1)::tbb-2-3'UTR*] was used to assess  
939 piRNA pathway function (35). Synchronized larvae containing *mjIs144* in wild type  
940 or mutant backgrounds were maintained at 20°C, and scored for germ line expression  
941 24 hours post-L4 stage. Four experiments were conducted per strain, with a minimum  
942 of 25 worms per experiment. GFP was scored using a Zeiss Axioplan 2 upright  
943 widefield microscope, where the level of GFP expression was assessed (none, low,  
944 moderate). Moderate expression was scored when GFP was easily detectible in  
945 oocytes and pachytene nuclei. Low expression was scored when GFP was just visible  
946 in oocyte and pachytene nuclei. In Figure 6, silenced represent gonads with no  
947 expression and Expressed - GFP(+) represent moderate or low expression. In the case  
948 of *met-2*, all expression was in the low category.

949

### 950 **RNA FISH**

951 N2, *hpl-2*, *lin-13*, *let-418*, and *prg-1* young adults were fixed and stained by RNA  
952 FISH as described (60). Stellaris® FISH probes targeting MIRAGE1 and *sqv-1* (as an  
953 internal control) were obtained from Bioresearch Technologies (Novato, CA). CAL  
954 Fluor Red610 was used for MIRAGE1 and Quasar 570 was used for *sqv-1*. From 11-  
955 22 individuals per strain were scored.

956

957 **Datasets**

958 Datasets generated in this paper are available at GEO accession GSE87524.

## **Acknowledgements**

We are grateful to A. Akay for helpful comments on the manuscript. This work was supported by Wellcome Trust Senior Research Fellowships to JA (054523 and 101863). AM was supported by a fellowship from the Canadian Institutes of Health Research, DA by a Darwin Trust scholarship, and AS by an HFSP postdoctoral fellowship. EM was supported by grants from the Wellcome Trust (104640/Z/14/Z) and Cancer Research UK (C13474/A18583). JA and EM also acknowledge support by core funding from the Wellcome Trust (092096) and Cancer Research UK (C6946/A14492).

## References

1. Wang J, Jia ST, & Jia S (2016) New Insights into the Regulation of Heterochromatin. *Trends in genetics : TIG* 32(5):284-294.
2. Liu T, *et al.* (2011) Broad chromosomal domains of histone modification patterns in *C. elegans*. *Genome research* 21(2):227-236.
3. Towbin BD, *et al.* (2012) Step-wise methylation of histone H3K9 positions heterochromatin at the nuclear periphery. *Cell* 150(5):934-947.
4. Zeng W, Ball AR, Jr., & Yokomori K (2010) HP1: heterochromatin binding proteins working the genome. *Epigenetics* 5(4):287-292.
5. James TC & Elgin SC (1986) Identification of a nonhistone chromosomal protein associated with heterochromatin in *Drosophila melanogaster* and its gene. *Molecular and cellular biology* 6(11):3862-3872.
6. Saksouk N, Simboeck E, & Dejardin J (2015) Constitutive heterochromatin formation and transcription in mammals. *Epigenetics & chromatin* 8:3.
7. Meier K & Brehm A (2014) Chromatin regulation: how complex does it get? *Epigenetics* 9(11):1485-1495.
8. Couteau F, Guerry F, Muller F, & Palladino F (2002) A heterochromatin protein 1 homologue in *Caenorhabditis elegans* acts in germline and vulval development. *EMBO reports* 3(3):235-241.
9. von Zelewsky T, *et al.* (2000) The *C. elegans* Mi-2 chromatin-remodelling proteins function in vulval cell fate determination. *Development* 127(24):5277-5284.
10. Melendez A & Greenwald I (2000) *Caenorhabditis elegans* lin-13, a member of the LIN-35 Rb class of genes involved in vulval development, encodes a protein with zinc fingers and an LXCXE motif. *Genetics* 155(3):1127-1137.
11. Schott S, Coustham V, Simonet T, Bedet C, & Palladino F (2006) Unique and redundant functions of *C. elegans* HP1 proteins in post-embryonic development. *Developmental biology* 298(1):176-187.
12. Koester-Eiserfunke N & Fischle W (2011) H3K9me<sub>2/3</sub> binding of the MBT domain protein LIN-61 is essential for *Caenorhabditis elegans* vulva development. *PLoS genetics* 7(3):e1002017.
13. Wu X, Shi Z, Cui M, Han M, & Ruvkun G (2012) Repression of germline RNAi pathways in somatic cells by retinoblastoma pathway chromatin complexes. *PLoS genetics* 8(3):e1002542.
14. Garrigues JM, Sidoli S, Garcia BA, & Strome S (2015) Defining heterochromatin in *C. elegans* through genome-wide analysis of the heterochromatin protein 1 homolog HPL-2. *Genome research* 25(1):76-88.
15. Studencka M, *et al.* (2012) Transcriptional repression of Hox genes by *C. elegans* HP1/HPL and H1/HIS-24. *PLoS genetics* 8(9):e1002940.
16. Harrison MM, Lu X, & Horvitz HR (2007) LIN-61, one of two *Caenorhabditis elegans* malignant-brain-tumor-repeat-containing proteins, acts with the DRM and NuRD-like protein complexes in vulval development but not in certain other biological processes. *Genetics* 176(1):255-271.
17. Coustham V, *et al.* (2006) The *C. elegans* HP1 homologue HPL-2 and the LIN-13 zinc finger protein form a complex implicated in vulval development. *Developmental biology* 297(2):308-322.

18. Unhavaithaya Y, *et al.* (2002) MEP-1 and a homolog of the NURD complex component Mi-2 act together to maintain germline-soma distinctions in *C. elegans*. *Cell* 111(7):991-1002.
19. Passannante M, *et al.* (2010) Different Mi-2 complexes for various developmental functions in *Caenorhabditis elegans*. *PloS one* 5(10):e13681.
20. Andersen EC & Horvitz HR (2007) Two *C. elegans* histone methyltransferases repress *lin-3* EGF transcription to inhibit vulval development. *Development* 134(16):2991-2999.
21. Kerr SC, Ruppensburg CC, Francis JW, & Katz DJ (2014) SPR-5 and MET-2 function cooperatively to reestablish an epigenetic ground state during passage through the germ line. *Proceedings of the National Academy of Sciences of the United States of America* 111(26):9509-9514.
22. Petrella LN, *et al.* (2011) synMuv B proteins antagonize germline fate in the intestine and ensure *C. elegans* survival. *Development* 138(6):1069-1079.
23. Poulin G, Dong Y, Fraser AG, Hopper NA, & Ahringer J (2005) Chromatin regulation and sumoylation in the inhibition of Ras-induced vulval development in *Caenorhabditis elegans*. *The EMBO journal* 24(14):2613-2623.
24. Simonet T, Dulermo R, Schott S, & Palladino F (2007) Antagonistic functions of SET-2/SET1 and HPL/HP1 proteins in *C. elegans* development. *Developmental biology* 312(1):367-383.
25. Yuan P, *et al.* (2009) Eset partners with Oct4 to restrict extraembryonic trophoblast lineage potential in embryonic stem cells. *Genes & development* 23(21):2507-2520.
26. Karimi MM, *et al.* (2011) DNA methylation and SETDB1/H3K9me3 regulate predominantly distinct sets of genes, retroelements, and chimeric transcripts in mESCs. *Cell stem cell* 8(6):676-687.
27. Bilodeau S, Kagey MH, Frampton GM, Rahl PB, & Young RA (2009) SetDB1 contributes to repression of genes encoding developmental regulators and maintenance of ES cell state. *Genes & development* 23(21):2484-2489.
28. Liu S, *et al.* (2014) Setdb1 is required for germline development and silencing of H3K9me3-marked endogenous retroviruses in primordial germ cells. *Genes & development* 28(18):2041-2055.
29. Maksakova IA, *et al.* (2013) Distinct roles of KAP1, HP1 and G9a/GLP in silencing of the two-cell-specific retrotransposon MERVL in mouse ES cells. *Epigenetics & chromatin* 6(1):15.
30. Greil F, *et al.* (2003) Distinct HP1 and Su(var)3-9 complexes bind to sets of developmentally coexpressed genes depending on chromosomal location. *Genes & development* 17(22):2825-2838.
31. de Wit E, Greil F, & van Steensel B (2005) Genome-wide HP1 binding in *Drosophila*: developmental plasticity and genomic targeting signals. *Genome research* 15(9):1265-1273.
32. Montoya-Durango DE, *et al.* (2016) LINE-1 silencing by retinoblastoma proteins is effected through the nucleosomal and remodeling deacetylase multiprotein complex. *BMC cancer* 16:38.
33. Hu G & Wade PA (2012) NuRD and pluripotency: a complex balancing act. *Cell stem cell* 10(5):497-503.

34. Weick EM & Miska EA (2014) piRNAs: from biogenesis to function. *Development* 141(18):3458-3471.
35. Ashe A, *et al.* (2012) piRNAs can trigger a multigenerational epigenetic memory in the germline of *C. elegans*. *Cell* 150(1):88-99.
36. Wang G & Reinke V (2008) A *C. elegans* Piwi, PRG-1, regulates 21U-RNAs during spermatogenesis. *Current biology : CB* 18(12):861-867.
37. Das PP, *et al.* (2008) Piwi and piRNAs act upstream of an endogenous siRNA pathway to suppress Tc3 transposon mobility in the *Caenorhabditis elegans* germline. *Molecular cell* 31(1):79-90.
38. Batista PJ, *et al.* (2008) PRG-1 and 21U-RNAs interact to form the piRNA complex required for fertility in *C. elegans*. *Molecular cell* 31(1):67-78.
39. Shirayama M, *et al.* (2012) piRNAs initiate an epigenetic memory of nonself RNA in the *C. elegans* germline. *Cell* 150(1):65-77.
40. Luteijn MJ, *et al.* (2012) Extremely stable Piwi-induced gene silencing in *Caenorhabditis elegans*. *The EMBO journal* 31(16):3422-3430.
41. Lee HC, *et al.* (2012) *C. elegans* piRNAs mediate the genome-wide surveillance of germline transcripts. *Cell* 150(1):78-87.
42. Guang S, *et al.* (2010) Small regulatory RNAs inhibit RNA polymerase II during the elongation phase of transcription. *Nature* 465(7301):1097-1101.
43. Gu W, *et al.* (2009) Distinct argonaute-mediated 22G-RNA pathways direct genome surveillance in the *C. elegans* germline. *Molecular cell* 36(2):231-244.
44. Gu SG, *et al.* (2012) Amplification of siRNA in *Caenorhabditis elegans* generates a transgenerational sequence-targeted histone H3 lysine 9 methylation footprint. *Nature genetics* 44(2):157-164.
45. Burton NO, Burkhart KB, & Kennedy S (2011) Nuclear RNAi maintains heritable gene silencing in *Caenorhabditis elegans*. *Proceedings of the National Academy of Sciences of the United States of America* 108(49):19683-19688.
46. Burkhart KB, *et al.* (2011) A pre-mRNA-associating factor links endogenous siRNAs to chromatin regulation. *PLoS genetics* 7(8):e1002249.
47. Buckley BA, *et al.* (2012) A nuclear Argonaute promotes multigenerational epigenetic inheritance and germline immortality. *Nature* 489(7416):447-451.
48. Mao H, *et al.* (2015) The Nrde Pathway Mediates Small-RNA-Directed Histone H3 Lysine 27 Trimethylation in *Caenorhabditis elegans*. *Current biology : CB* 25(18):2398-2403.
49. Allo M & Kornblihtt AR (2010) Gene silencing: small RNAs control RNA polymerase II elongation. *Current biology : CB* 20(17):R704-707.
50. Guang S, *et al.* (2008) An Argonaute transports siRNAs from the cytoplasm to the nucleus. *Science* 321(5888):537-541.
51. Ni JZ, Chen E, & Gu SG (2014) Complex coding of endogenous siRNA, transcriptional silencing and H3K9 methylation on native targets of germline nuclear RNAi in *C. elegans*. *BMC genomics* 15:1157.
52. Feng YL, Xiang JF, Kong N, Cai XJ, & Xie AY (2016) Buried territories: heterochromatic response to DNA double-strand breaks. *Acta biochimica et biophysica Sinica* 48(7):594-602.



53. Gursoy-Yuzugullu O, House N, & Price BD (2016) Patching Broken DNA: Nucleosome Dynamics and the Repair of DNA Breaks. *Journal of molecular biology* 428(9 Pt B):1846-1860.
54. Ceol CJ, Stegmeier F, Harrison MM, & Horvitz HR (2006) Identification and classification of genes that act antagonistically to let-60 Ras signaling in *Caenorhabditis elegans* vulval development. *Genetics* 173(2):709-726.
55. Thomas JH, Ceol CJ, Schwartz HT, & Horvitz HR (2003) New genes that interact with lin-35 Rb to negatively regulate the let-60 ras pathway in *Caenorhabditis elegans*. *Genetics* 164(1):135-151.
56. Sha K, *et al.* (2010) Distributed probing of chromatin structure in vivo reveals pervasive chromatin accessibility for expressed and non-expressed genes during tissue differentiation in *C. elegans*. *BMC genomics* 11:465.
57. Hubley R, *et al.* (2016) The Dfam database of repetitive DNA families. *Nucleic acids research* 44(D1):D81-89.
58. Chiolo I, *et al.* (2011) Double-strand breaks in heterochromatin move outside of a dynamic HP1a domain to complete recombinational repair. *Cell* 144(5):732-744.
59. Sinha M, Watanabe S, Johnson A, Moazed D, & Peterson CL (2009) Recombinational repair within heterochromatin requires ATP-dependent chromatin remodeling. *Cell* 138(6):1109-1121.
60. Raj A, van den Bogaard P, Rifkin SA, van Oudenaarden A, & Tyagi S (2008) Imaging individual mRNA molecules using multiple singly labeled probes. *Nature methods* 5(10):877-879.
61. Wallace NA, *et al.* (2013) HPV 5 and 8 E6 expression reduces ATM protein levels and attenuates LINE-1 retrotransposition. *Virology* 443(1):69-79.
62. Johnson NM, Lemmens BB, & Tijsterman M (2013) A role for the malignant brain tumour (MBT) domain protein LIN-61 in DNA double-strand break repair by homologous recombination. *PLoS genetics* 9(3):e1003339.
63. Pothof J, *et al.* (2003) Identification of genes that protect the *C. elegans* genome against mutations by genome-wide RNAi. *Genes & development* 17(4):443-448.
64. Luijsterburg MS, *et al.* (2009) Heterochromatin protein 1 is recruited to various types of DNA damage. *The Journal of cell biology* 185(4):577-586.
65. Muzzini DM, Plevani P, Boulton SJ, Cassata G, & Marini F (2008) *Caenorhabditis elegans* POLQ-1 and HEL-308 function in two distinct DNA interstrand cross-link repair pathways. *DNA repair* 7(6):941-950.
66. Gartner A, Boag PR, & Blackwell TK (2008) Germline survival and apoptosis. *WormBook: the online review of C. elegans biology*:1-20.
67. Schumacher B, Hofmann K, Boulton S, & Gartner A (2001) The *C. elegans* homolog of the p53 tumor suppressor is required for DNA damage-induced apoptosis. *Current biology: CB* 11(21):1722-1727.
68. Derry WB, Putzke AP, & Rothman JH (2001) *Caenorhabditis elegans* p53: role in apoptosis, meiosis, and stress resistance. *Science* 294(5542):591-595.
69. Zhou Z, Hartweg E, & Horvitz HR (2001) CED-1 is a transmembrane receptor that mediates cell corpse engulfment in *C. elegans*. *Cell* 104(1):43-56.

70. Dernburg AF, *et al.* (1998) Meiotic recombination in *C. elegans* initiates by a conserved mechanism and is dispensable for homologous chromosome synapsis. *Cell* 94(3):387-398.
71. Castel SE & Martienssen RA (2013) RNA interference in the nucleus: roles for small RNAs in transcription, epigenetics and beyond. *Nature reviews. Genetics* 14(2):100-112.
72. Martienssen R & Moazed D (2015) RNAi and heterochromatin assembly. *Cold Spring Harbor perspectives in biology* 7(8):a019323.
73. Swenson JM, Colmenares SU, Strom AR, Costes SV, & Karpen GH (2016) The composition and organization of *Drosophila* heterochromatin are heterogeneous and dynamic. *eLife* 5.
74. Zeller P, *et al.* (2016) Histone H3K9 methylation is dispensable for *Caenorhabditis elegans* development but suppresses RNA:DNA hybrid-associated repeat instability. *Nature genetics* 48(11):1385-1395.
75. Penke TJ, McKay DJ, Strahl BD, Matera AG, & Duronio RJ (2016) Direct interrogation of the role of H3K9 in metazoan heterochromatin function. *Genes & development* 30(16):1866-1880.
76. Motamedi MR, *et al.* (2004) Two RNAi complexes, RITS and RDRC, physically interact and localize to noncoding centromeric RNAs. *Cell* 119(6):789-802.
77. Verdell A, *et al.* (2004) RNAi-mediated targeting of heterochromatin by the RITS complex. *Science* 303(5658):672-676.
78. de Albuquerque BF, Placentino M, & Ketting RF (2015) Maternal piRNAs Are Essential for Germline Development following De Novo Establishment of Endo-siRNAs in *Caenorhabditis elegans*. *Developmental cell* 34(4):448-456.
79. Ikegami K, Egelhofer TA, Strome S, & Lieb JD (2010) *Caenorhabditis elegans* chromosome arms are anchored to the nuclear membrane via discontinuous association with LEM-2. *Genome biology* 11(12):R120.
80. Alagoz M, *et al.* (2015) SETDB1, HP1 and SUV39 promote repositioning of 53BP1 to extend resection during homologous recombination in G2 cells. *Nucleic acids research* 43(16):7931-7944.
81. Polo SE, Kaidi A, Baskcomb L, Galanty Y, & Jackson SP (2010) Regulation of DNA-damage responses and cell-cycle progression by the chromatin remodelling factor CHD4. *The EMBO journal* 29(18):3130-3139.
82. Urquhart AJ, Gatei M, Richard DJ, & Khanna KK (2011) ATM mediated phosphorylation of CHD4 contributes to genome maintenance. *Genome integrity* 2(1):1.
83. Larsen DH, *et al.* (2010) The chromatin-remodeling factor CHD4 coordinates signaling and repair after DNA damage. *The Journal of cell biology* 190(5):731-740.
84. Pan MR, *et al.* (2012) Chromodomain helicase DNA-binding protein 4 (CHD4) regulates homologous recombination DNA repair, and its deficiency sensitizes cells to poly(ADP-ribose) polymerase (PARP) inhibitor treatment. *The Journal of biological chemistry* 287(9):6764-6772.
85. Smeenk G, *et al.* (2010) The NuRD chromatin-remodeling complex regulates signaling and repair of DNA damage. *The Journal of cell biology* 190(5):741-749.

86. Soria G & Almouzni G (2013) Differential contribution of HP1 proteins to DNA end resection and homology-directed repair. *Cell cycle* 12(3):422-429.
87. Meek DW (2009) Tumour suppression by p53: a role for the DNA damage response? *Nature reviews. Cancer* 9(10):714-723.
88. Derry WB, *et al.* (2007) Regulation of developmental rate and germ cell proliferation in *Caenorhabditis elegans* by the p53 gene network. *Cell death and differentiation* 14(4):662-670.
89. Hoffman S, Martin D, Melendez A, & Bargonetti J (2014) *C. elegans* CEP-1/p53 and BEC-1 are involved in DNA repair. *PLoS one* 9(2):e88828.
90. Kolasinska-Zwierz P, *et al.* (2009) Differential chromatin marking of introns and expressed exons by H3K36me3. *Nature genetics* 41(3):376-381.
91. Li H & Durbin R (2010) Fast and accurate long-read alignment with Burrows-Wheeler transform. *Bioinformatics* 26(5):589-595.
92. Cheung MS, Down TA, Latorre I, & Ahringer J (2011) Systematic bias in high-throughput sequencing data and its correction by BEADS. *Nucleic acids research* 39(15):e103.
93. Feng J, Liu T, Qin B, Zhang Y, & Liu XS (2012) Identifying ChIP-seq enrichment using MACS. *Nature protocols* 7(9):1728-1740.
94. Li Q, Brown, J.B, Huang, H., and Bickel, P.J. (2011) Measuring reproducibility of high-throughput experiments. *Ann. Appl. Stat.* 5:1752-1779.
95. Chen H & Boutros PC (2011) VennDiagram: a package for the generation of highly-customizable Venn and Euler diagrams in R. *BMC bioinformatics* 12:35.
96. Lex A, Gehlenborg N, Strobel H, Vuillemot R, & Pfister H (2014) UpSet: Visualization of Intersecting Sets. *IEEE transactions on visualization and computer graphics* 20(12):1983-1992.
97. Love MI, Huber W, & Anders S (2014) Moderated estimation of fold change and dispersion for RNA-seq data with DESeq2. *Genome biology* 15(12):550.
98. Latorre I, *et al.* (2015) The DREAM complex promotes gene body H2A.Z for target repression. *Genes & development* 29(5):495-500.
99. Lant B & Derry WB (2014) Fluorescent visualization of germline apoptosis in living *Caenorhabditis elegans*. *Cold Spring Harbor protocols* 2014(4):420-427.
100. Lu N, Yu X, He X, & Zhou Z (2009) Detecting apoptotic cells and monitoring their clearance in the nematode *Caenorhabditis elegans*. *Methods in molecular biology* 559:357-370.
101. Kamath RS, *et al.* (2003) Systematic functional analysis of the *Caenorhabditis elegans* genome using RNAi. *Nature* 421(6920):231-237.
102. Ahringer (ed.) J (Reverse genetics. in *WormBook: the online review of C. elegans biology*, ed Community TcER (Wormbook).
103. Baugh LR, *et al.* (2005) Synthetic lethal analysis of *Caenorhabditis elegans* posterior embryonic patterning genes identifies conserved genetic interactions. *Genome biology* 6(5):R45.

## Figure legends

### Figure 1. Heterochromatin proteins have redundant roles in fertility.

(A) Genetic interactions in fertility assayed using RNAi. Indicated RNAi of wild-type, *let-418(n3536)*, or *lin-13(n770)* was conducted by feeding at 20°C as described in the methods. Results are a combination of two independent experiments with the progeny of 3-8 total broods counted for each strain/RNAi combination. A one-sided t-test was used to determine whether the mutant/RNAi combination had a lower brood size than expected under a multiplicative model of interaction when compared to the mutant grown on empty vector RNAi and the individual RNAi knockdowns in wild-type animals. Brood size is significantly lower than expected for all RNAi/mutant combinations at  $p < 0.05$ . (B) Indicated double mutants were constructed and their brood sizes compared to that of the individual signal mutants raised at 20°C. Statistical testing was as in (A), with brood sizes of the three double mutants significantly lower than expected at  $p < 0.05$  in a one-sided t-test. (C) All pairs of *hpl-2*, *lin-13*, *lin-61*, *let-418*, and *met-2* show genetic interactions in fertility, as determined in this study or previous studies. ref 1. Coustam et al, *Dev Biol.* 2006. ref 2. Koester-Eiserfunke and Fischle, *PLoS Genet.* 2011. ref 3. Simonet et al, *Dev Biol.* 2007. Supplementary file 1 shows previously reported sterility phenotypes. Figure 1 – figure supplement 1 shows examples and quantification of abnormal oogenesis in heterochromatin mutants.

### Figure 2. HPL-2, LET-418, LIN-13, LIN-61, and MET-2 show extensive co-binding and are enriched at repetitive elements.

(A) Distribution of the indicated proteins and histone modifications over each *C. elegans* chromosome. z-scored ChIP-seq tracks are shown for HPL-2 (red), LET-418 (blue), LIN-13 (green), LIN-61 (orange), MET-2 (pink), H3K9me2 (grey) and H3K9me3 (black) on each chromosome, demonstrating enrichment over the autosomal arms. Figure 2-figure supplement 1A shows distributions of peak locations in different chromosome regions. (B) IGV browser screenshot showing similar patterns of the heterochromatin factors and H3K9me2 methylation over a 45 kb region containing multiple repeat elements. z-scored ChIP-seq tracks are as in (A). Any5 peak calls denote combined peak calls for any of the five proteins; repeats are from Dfam2.0 {Hubley, 2016 #4}. Figure 2-figure supplement 1B shows correlations in signal between all datasets. (C) UpSet plot of the association of heterochromatin factors with the 33,301 Any5 peak calls. Dots indicate peak class is bound by the factor. Bars show total number of peaks per class, the orange portion denoting overlap with repeat elements. Below the bar chart relative enrichments for H3K9me2 and H3K9me3 are shown. The peaks that overlap all 5 factors constitute the largest class ( $n=4810$ ). Figure 2-figure supplement 1 gives total peak numbers per factor, number of peaks overlapping repeats, and number of repeats bound by each factor. Figure 2-source data 1 gives peak calls. (D) Associations of factors and repeat classes. Upper panel: levels of indicated protein or histone modification on families within indicated Dfam 2.0 repeat classes relative to the genome average. Bottom panel: Proportion of families within each repeat class significantly enriched for

indicated factor or histone modification. Criteria for enrichment are >1.5 fold mean enrichment of family relative to genome, FDR<0.1, considering families with at least 10 members. Number of families with 10 or more members within each class are: Cut and paste (n=89), Helitron (n=7), LTR (n=31), LINE (n=13), SINE (n=3), Satellite (n=16), Unknown (n=7). Figure 2-source data 2 gives enrichment scores for repeat family factor binding.

**Figure 3. Repetitive elements are upregulated in *hpl-2*, *let-418*, *lin-13*, *lin-61*, *met-2 set-25*, *prg-1*, *nrde-2*, and *nrde-2*; *let-418* mutants.**

(A) Venn diagram of elements upregulated in *hpl-2*, *let-418*, *lin-13*, *lin-61*, and *met-2 set-25* mutants. The seven elements upregulated in all five strains are MIRAGE1 elements. (B) Distribution of Dfam 2.0 repeat classes upregulated in each strain. (C) Repeat families with members upregulated in at least one of *hpl-2*, *let-418*, *lin-13*, *lin-61*, or *met-2 set-25* mutant strains. (D) IGV browser screenshot of a MIRAGE1 element that is upregulated in all mutant strains. Tracks are reads per million of two combined replicates. Figure 3-figure supplement 1 gives further examples of elements upregulated in different strains. (E) Single molecule RNA-FISH signals of MIRAGE 1 element RNA in the adult germ line (white dots). Signal is not detectable in wild-type but is abundant in the indicated mutant backgrounds. Figure 3 – figure supplement 3 shows additional images of MIRAGE1 and *sqv-1* control RNA FISH in germline and somatic tissues. Figure 3-figure supplement 2 shows enrichment of heterochromatin factors, H3K9me2, and H3K9me3 on regulated genes and repeats.

**Figure 4. Phenotypic suppression of *hpl-2*, *let-418* and *lin-13* by inhibition of MIRAGE1, *cep-1/p53*, or *spo-11***

(A) RNAi of MIRAGE1, *cep-1/p53* or *spo-11* partially suppresses sterility of *hpl-2*, *let-418*, and *lin-13*. Average number of progeny per worm for control empty vector RNAi (EV) or the indicated RNAi treatments in *hpl-2(tm1489)*, *let-418(n3536)*, or *lin-13(n770)* (averages of 5-11 experiments). Experiments were done under conditions where the mutant strain was nearly sterile to detect an increase in fertility (see Methods). Control progeny numbers vary by experiment, but were always paired with experimental RNAi. Stars indicate statistical significance assessed using paired t-tests, comparing experimental to control RNAi (p<0.05, one star; p<0.01, two stars; p<0.001, three stars). Two sets of RNAi clones were used to target MIRAGE1 elements (termed mirage-A and mirage-B). RNAi clones used are given in the methods. (B) Mutation of *cep-1/p53* partially suppresses sterility of *hpl-2*, *let-418*, and *lin-13* mutants at 25°C. Statistical significance was assessed using single sided t-tests, asking if *cep-1*; *hpl-2*, *cep-1*; *let-418*, and *cep-1*; *lin-13* double mutants had larger broods than the corresponding heterochromatin single mutants. See methods for growth conditions. (C) Loss of *cep-1* partially rescues growth delay defect of heterochromatin mutants at 25°C. Developmental stage of worms grown from L1 at 25C for approximately 48 hrs was assessed (adult, L4, younger than L4). A

representative experiment out of three replicates is shown, assaying between 95 and 213 worms in each. See methods for growth conditions.

### Figure 5. Heterochromatin mutants have increased germline apoptosis.

CED-1::GFP (*bcls39* [*Plim-7::ced-1::gfp*]), expressed in gonad sheath cells, marks engulfed apoptotic cells in the pachytene region of the adult gonad. (A) CED-1::GFP images for wild type, *hpl-2*, and *met-2 set-25* mutant gonads. Arrows point to engulfed apoptotic cells; scale bar = 16  $\mu$ m. (B) Number of apoptotic cells per gonad arm for wild-type (*bcls39*), *hpl-2(tm1489)*; *bcls39, lin-13(n770)*; *bcls39, met-2(n4256) set-25(n5021)*; *bcls39*. Shown are the combined data points of at least 3 independent replicates; each dot represents an individual gonad arm count. Bars denote mean and SD. Mann-whitney non-parametric tests were performed on mutant versus control. (p-values for *hpl-2, lin-61, met-2 set-25* are <0.0001; p-value for *lin-13* is 0.009). Strains were cultured at 20°C and scored 48 hrs after the L4 stage. Figure 5 –figure supplement 1 shows increased sensitivity of *hpl-2* to IR-induced DNA damage.

### Figure 6. Heterochromatin factors interact with the piRNA pathway.

(A) Venn diagram showing extent of overlap between repeats upregulated in *prg-1* mutants and repeats upregulated in any of the five heterochromatin factor mutant strains (*hpl-2, let-418, lin-13, lin-61, or met-2 set-25*). Listed in the Venn are the numbers of repeats and repeat families common or unique to *prg-1*. (B) *prg-1* mutant germ lines show increased germ cell death. Shown are the number of apoptotic cells per gonad arm for *bcls39* (CED-1::GFP) and *prg-1; bcls39* (CED-1::GFP). Each dot represents an individual gonad arm count. Bars denote mean and SD. A minimum of 25 gonads were scored per experiment and shown are the combined datapoints of at least 3 independent replicates. Mann-whitney non-parametric tests were performed on mutant versus control (P-value <0.0001). Strains were cultured at 20°C until L4 stage, then shifted to 25°C for 48 hrs before scoring. (C,D) Heterochromatin mutants desilence a piRNA sensor. piRNA sensor expression (*mjls144* [*mex-5p::HIS-58::GFP::piRNA(21UR-1)::tbb-2-3'UTR*]) was quantified in one day old wild-type and heterochromatin mutants cultured at 20°C. (C) Representative GFP and DIC microscope images of adult germlines in which the reporter is silent (WT, *lin-13*) or expressed (*lin-61*). (D) Quantification of piRNA sensor expression in wild type and heterochromatin mutants. Shown are the means and standard error of the percentage of worms which at least weakly desilenced the GFP reporter in oocytes and pachytene regions. A minimum of 100 worms for each strain was assessed over four independent experiments. Fishers exact tests were performed on the combined datapoints to address significance, with *let-418* (p-value <0.0001), *lin-61* (p-value <0.0001) and *set-25* (p-value <0.0001) all displaying increased frequency of expression of the piRNA sensor reporter, while sensor expression in *lin-13* is

not significantly different from wild type (p-value 0.4419). *met-2* mutants weakly desilence the sensor in a small subset of adults scored (p-value 0.0215).

**Figure 7. *nrde-2* and *let-418* show functional redundancy.**

(A) *nrde-2* and *let-418* mutants show genetic interaction in fertility. Brood sizes of *nrde-2*; *hpl-2*, *nrde-2*; *let-418*, and *nrde-2*; *lin-61* double mutants were compared to those of single mutants. Synchronized single or double mutant strains of the indicated genotype were grown at 15°C until the L3 stage and then transferred to 25°C, and total progeny including dead embryos determined for 12-24 mothers across two independent experiments. A single-sided Mann-Whitney U test was used to determine whether the double mutant had a lower brood size than expected under a multiplicative model of interaction when compared to the individual single mutants. Brood size is significantly lower than expected for *nrde-2*; *let-418* (p =9.21E-11) but not *lin-61*; *nrde-2* (p=0.20) or *nrde-2*; *hpl-2* (p=98). (B) *nrde-2*; *hpl-2*, *nrde-2*; *let-418* and *lin-61*; *nrde-2* double mutants show increased proportion of dead embryos within their broods compared to single mutants. Total number of dead embryos was determined as a proportion relative to their total brood size for the experiment in (A). Mann-Whitney U tests were performed to compare the proportion of unhatched eggs in double mutants relative to *nrde-2* single mutants, and were all found to be significant at p<0.05. (C) Repeat families with members upregulated in *let-418*, *nrde-2*, and *nrde-2*; *let-418* young adult worms. Figure 7-figure supplement 1A compares repeat families upregulated in *nrde-2*, *prg-1*, or any of the five heterochromatin mutants (D) Example of repeats upregulated in *nrde-2*; *let-418*, but not the single mutants. Tracks are RNA-seq reads per million of two combined replicates. Figure 7-figure supplement 1B shows lack of MIRAGE1 expression in the *nrde-2* mutant background.

**Figure 8. Heterochromatin proteins collaborate with small RNAi pathways to maintain fertility.**

(A) Pathways of transposable element silencing in *C. elegans*. Heterochromatin factors participate in repetitive element silencing together with the piRNA and nuclear RNAi pathways, as well as targeting elements independently of these pathways. (B) Derepression of transposable elements and defects in DNA repair likely generate genotoxic stress that leads to germ line defects and infertility in heterochromatin factor mutants.

## Legends for Figure Supplements:

### **Figure 1 – figure supplement 1. Heterochromatin mutants display abnormal oogenesis**

(A) Strains of the indicated genotype were shifted to 25°C at the L4 stage and imaged by Nomarski microscopy 48 hours later. Oocyte quality was determined and deemed ‘abnormal’ when oocytes appeared small, round and gapped, showing the appearance of a curdled cytoplasm, or when they were unaligned and disorganized. Numbers in brackets denote the total number of germlines scored. Disintegrated germline refers to the absence of oocytes and an apparent disintegration of (most of the) gonad arm. Representative images of several of the mutants are shown. Scale bar is 33  $\mu$ m.

### **Figure 2-figure supplement 1. Correlation of HPL-2, LET-418, LIN-13, LIN-61, and MET-2 ChIP-seq tracks and enrichment on chromosome arms, repetitive elements, and telomeres.**

(A) Distribution of HPL-2, LET-418, LIN-13, LIN-61, MET-2, All5, or Any5 ChIP-seq peaks between chromosome arms and centers (left) and between genes (introns and exons) and intergenic regions on the centers (middle) and arms (right). (B) Pearson correlation coefficients for ChIP-seq track combined replicates in 100 bp windows. (C) Number of peaks for individual data sets within the 33301 Any5 combined peak calls, the numbers unique to each dataset and the numbers of peaks overlapping repetitive elements. (D) Numbers of Dfam 2.0 repetitive elements ( $n = 62331$ ) that have factors bound based on IDR peak calls (see Methods). (E) Enrichment scores for H3K9 methylation and binding of factors at telomeres.

### **Figure 3-figure supplement 1. Examples of unique and co-regulated repeat elements in various heterochromatin mutants.**

IGV screenshots of repeat elements upregulated in a subset of heterochromatin mutants. (A) HELITRON1 element only upregulated in *lin-13* mutants. (B) PALTTAA2 and CELE46B elements only upregulated in *hpl-2* mutants. (C) CER16 LTR element upregulated in *hpl-2*, *lin-61*, *nrde-2* and *nrde-2; let-418* mutants. Signal tracks are RPM normalized. Additional tracks show genes, Dfam2.0 repeats, and transposon ORFs.

### **Figure 3-figure supplement 2. Heterochromatin factors and H3K9 methylation show enriched association with upregulated genes and repeats.**

(A) Percent overlap of heterochromatin factor peaks or >1.5 fold enrichment for H3K9me2 or H3K9me3 on upregulated (left) or downregulated (right) genes (-



500 bp to gene end). Parentheses give number of genes with overlap, star indicates FDR<0.01. (B) Enrichment of factors over upregulated repeats in each of the mutant strains.

**Figure 3-figure supplement 3. MIRAGE1 RNA is upregulated in the germ lines of *hpl-2*, *lin-13*, *let-418*, and *prg-1* mutants.**

(A) Single molecule RNA-FISH signals of MIRAGE 1 RNA in the adult germ line (left panels; zoomed in on the right). Middle panels show *sqv-1* (positive control) RNA-FISH and DAPI to counterstain nuclei. (B) Single molecule RNA-FISH signals of MIRAGE 1 RNA, showing both germline and somatic tissues. MIRAGE1 (middle and indicated boxes zoomed in on the right) is increased in mutant germlines but remains low in the soma. Left, DAPI counterstain. Scale bar represents 30  $\mu$ m.

**Figure 5-figure supplement 1. *hpl-2* mutants are hypersensitive to ionizing radiation-induced DNA damage.**

(A) Phospho-CHK-1 staining of adult germ lines 1 hr post IR treatment. Bars are 10  $\mu$ m. (B) Quantification of phospho-CHK-1 staining. *hpl-2* mutants showed significantly more phospho-CHK-1 positive gonads than wild-type at an intermediate dose of 20 Gy. Strains were grown at 25°C. (C) Images and counts of oocyte chromosomes and fragments following IR. N2 and *hpl-2(tm1489)* were grown at 20°C, irradiated at 0, 50, and 100 Gy at the L4 stage, and stained with DAPI after 24 hours. Left, representative photographs of N2 and *hpl-2* oocytes. Right, counts of DAPI stained fragments in oocytes at the indicated dose of IR. The majority of non-irradiated N2 and *hpl-2* oocytes have 6 distinct DAPI bodies, representing the 6 bivalent chromosomes. *hpl-2* mutants show more fragmentation of oocyte chromosomes at 50 and 100 Gy, indicating a defect in repair of exogenous DNA damage. Bars are 5  $\mu$ m. A minimum of 88 oocytes were scored over two to three independent experiments.

**Figure 6-figure supplement 1. Quantification of piRNAs and dependent 22G RNAs in *prg-1* and *hpl-2* mutants**

(A) Unique piRNAs, repeat elements targeted by a piRNA, number of unique 22G RNAs mapping near piRNA target sites, and number of repeat elements hit by a piRNA-associated 22G RNA. The number in each class found in 530039 unique small RNA positions subsampled from each dataset (*prg-1*, *hpl-2*, and matched wild-types) is shown. (B) log<sub>2</sub> ratios of the relative change in abundance of the indicated classes of small RNA or repeats in mutant strains compared to wild-type. Datasets used and the procedure for calculating piRNA and dependent 22G RNA number is given in the Methods.

**Figure 7-figure supplement 1. Overlap of *nrde-2*, *prg-1*, and heterochromatin targets.**

(A) Repeat families with members upregulated in *nrde-2*, *prg-1*, and any of the five heterochromatin mutants (*let-418*, *hpl-2*, *lin-13*, *lin-61*, and *met-2 set-25*).

Families in bold are specific to a particular overlap. (B) RNA-seq tracks showing MIRAGE element upregulated in heterochromatin factor and *prg-1* mutants but not in *nrde-2* mutants.

### **Figure 7-figure supplement 2. H3K9me3 levels on repeats in nrde mutants**

(Top) H3K9me3 log<sub>2</sub>FC of average signal at indicated regions in *hrde-1*, *nrde-2*, *nrde-4*, and *nrde-3* mutants relative to wild-type. Control repeats have >1.5 fold average signal in wild-type relative to genome average, and no enrichment for any heterochromatin factor. *nrde-2*, all repeats upregulated in *nrde-2* mutants; any5 Heterochromatin, repeats upregulated in any of the 5 heterochromatin mutant strains, but not in *nrde-2* mutants; *prg-1*, repeats upregulated in *prg-1* mutants but not in *nrde-2* mutants. Parentheses show number of elements in each set. A reduction of H3K9me3 at repeat sets of interest was assessed by comparing to all repeats using a single-sided Mann-Whitney U test: one star,  $p < 0.1$ , two stars,  $p < 0.05$ ; three stars,  $p < 0.001$ . (Bottom) H3K9me3 levels relative to genome average at indicated regions in each dataset.

### **Figure 7-figure supplement 2. H3K9me3 levels on genes in nrde mutants**

(Top) H3K9me3 log<sub>2</sub>FC of average signal at indicated regions in *hrde-1*, *nrde-2*, *nrde-4*, and *nrde-3* mutants relative to wild-type. *nrde-2*, genes upregulated in *nrde-2* mutants. For each of the other strains, gene sets are those upregulated in the indicated mutant but not upregulated in *nrde-2* mutants. Parentheses show number of genes in each set. A reduction of H3K9me3 at gene sets of interest was assessed by comparing to all genes using a single-sided Mann-Whitney U test: one star,  $p < 0.1$ , two stars,  $p < 0.05$ ; three stars,  $p < 0.001$ . (Bottom) H3K9me3 levels relative to genome average at indicated regions in each dataset.

## **Supplementary files**

Supplementary file 1. LET-418, LIN-13, HPL-2, LIN-61, and MET-2 are required for normal fertility.

Supplementary file 2. Strains used in this study.

Supplementary file 3. Antibodies used in this study.

## **Source data files**

Figure 2-source data 1 - Peak calls

Figure 2-source data 2. Enrichment of factors at repeat families

Figure 2-source data 3 - Alignment Statistics for ChIP and RNA sequencing

Figure 3-source data 1 -Analysis of repeats

Figure 3-source data 2 - Repeats upregulated in any mutant strain

Figure 3-source data 3 - Analysis of genes

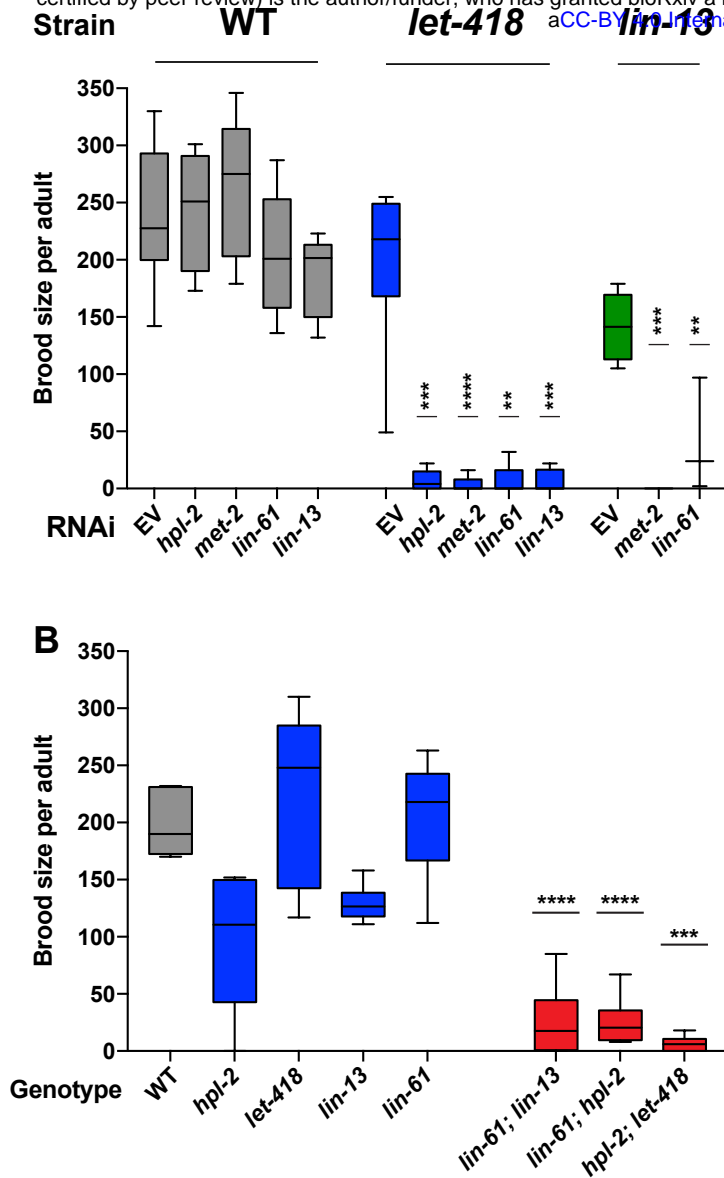

**C**

|                | <i>hpl-2</i> | <i>lin-13</i> | <i>lin-61</i> | <i>let-418</i> |
|----------------|--------------|---------------|---------------|----------------|
| <i>lin-13</i>  | ref 1        |               |               |                |
| <i>lin-61</i>  | ref 2        | This study    |               |                |
| <i>let-418</i> | This study   | This study    | This study    |                |
| <i>met-2</i>   | refs 2,3     | This study    | ref 2         | This study     |

**Figure 1**

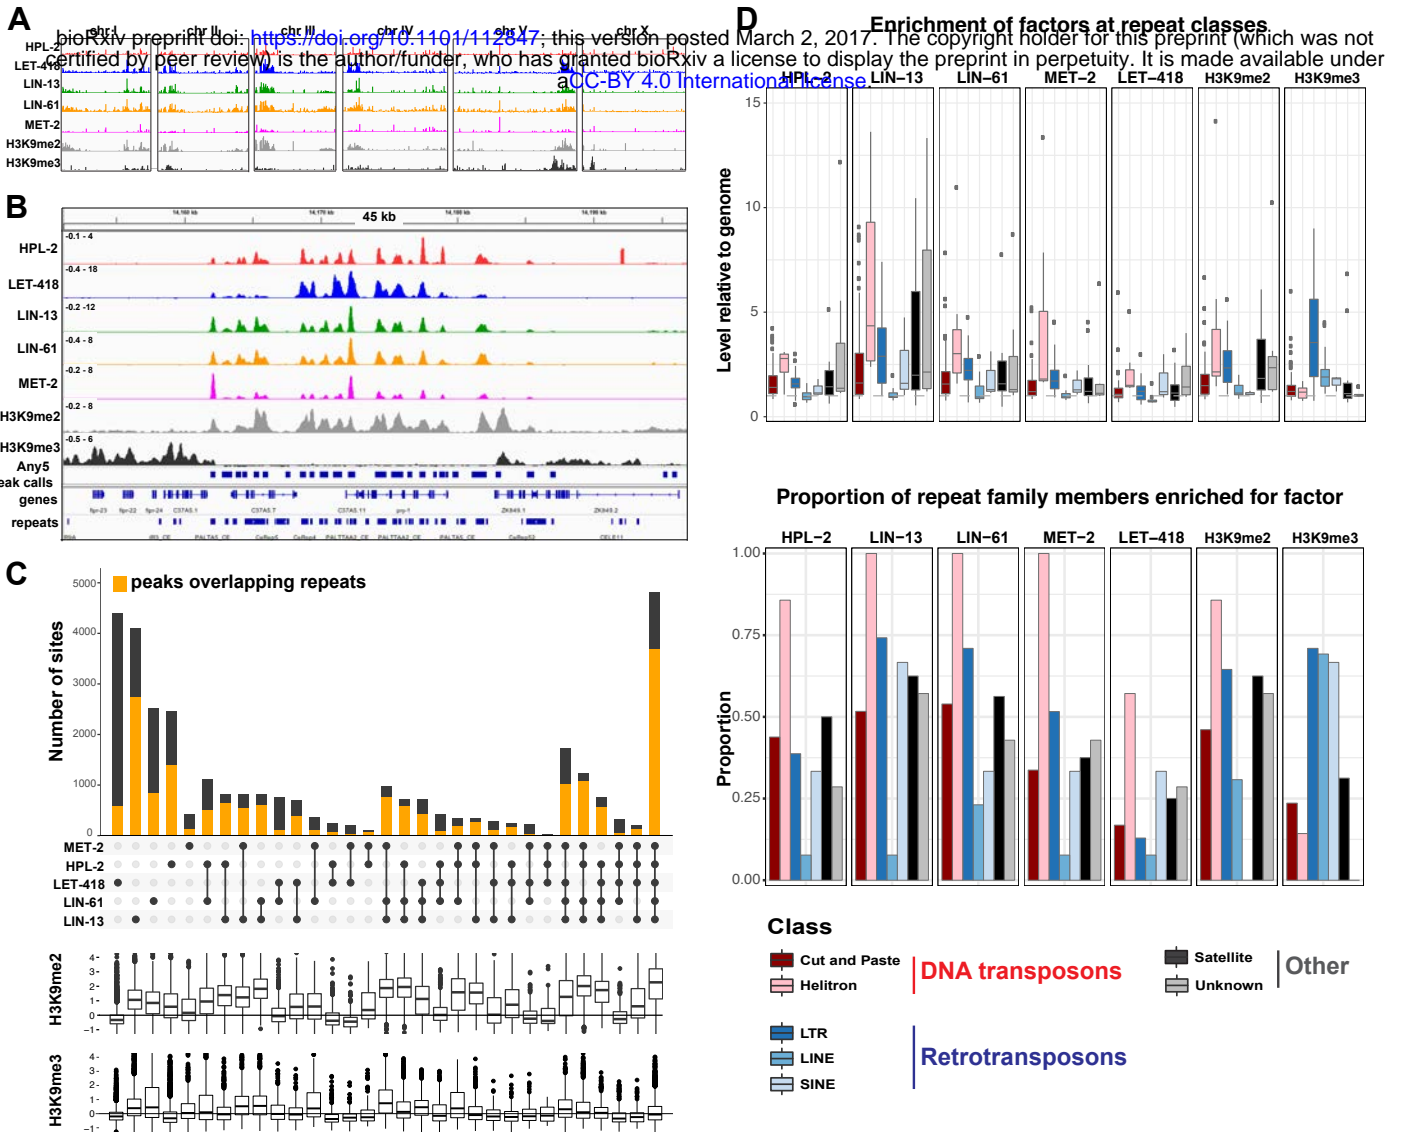

Figure 2

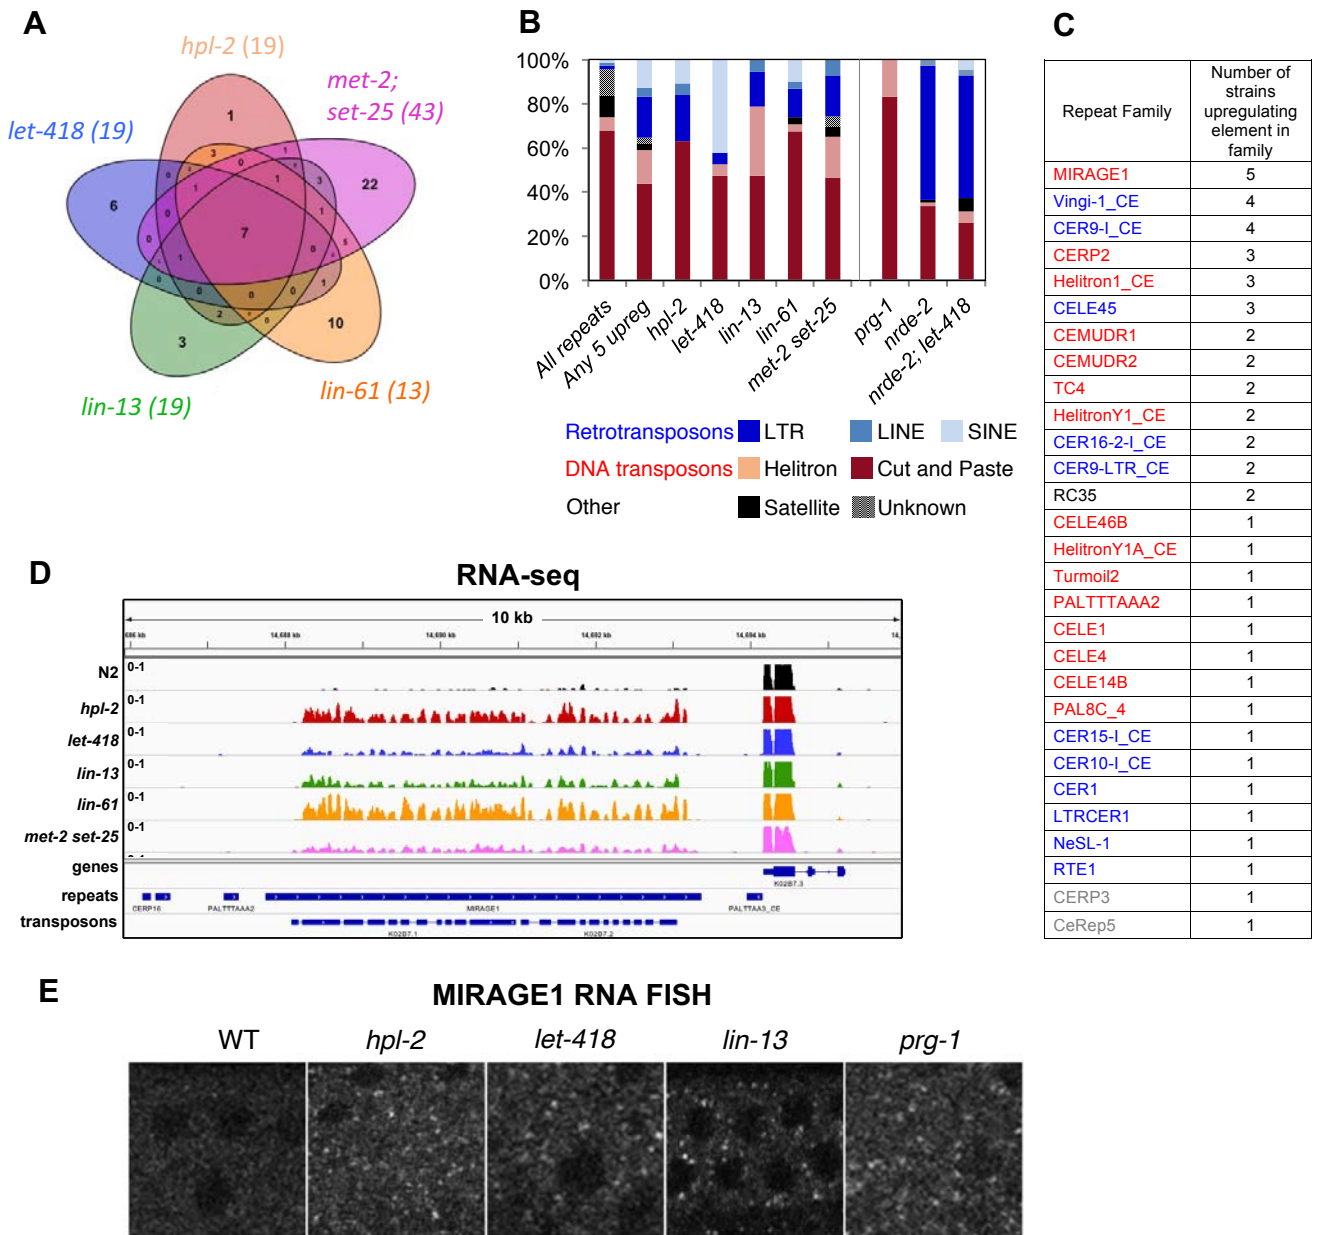

Figure 3

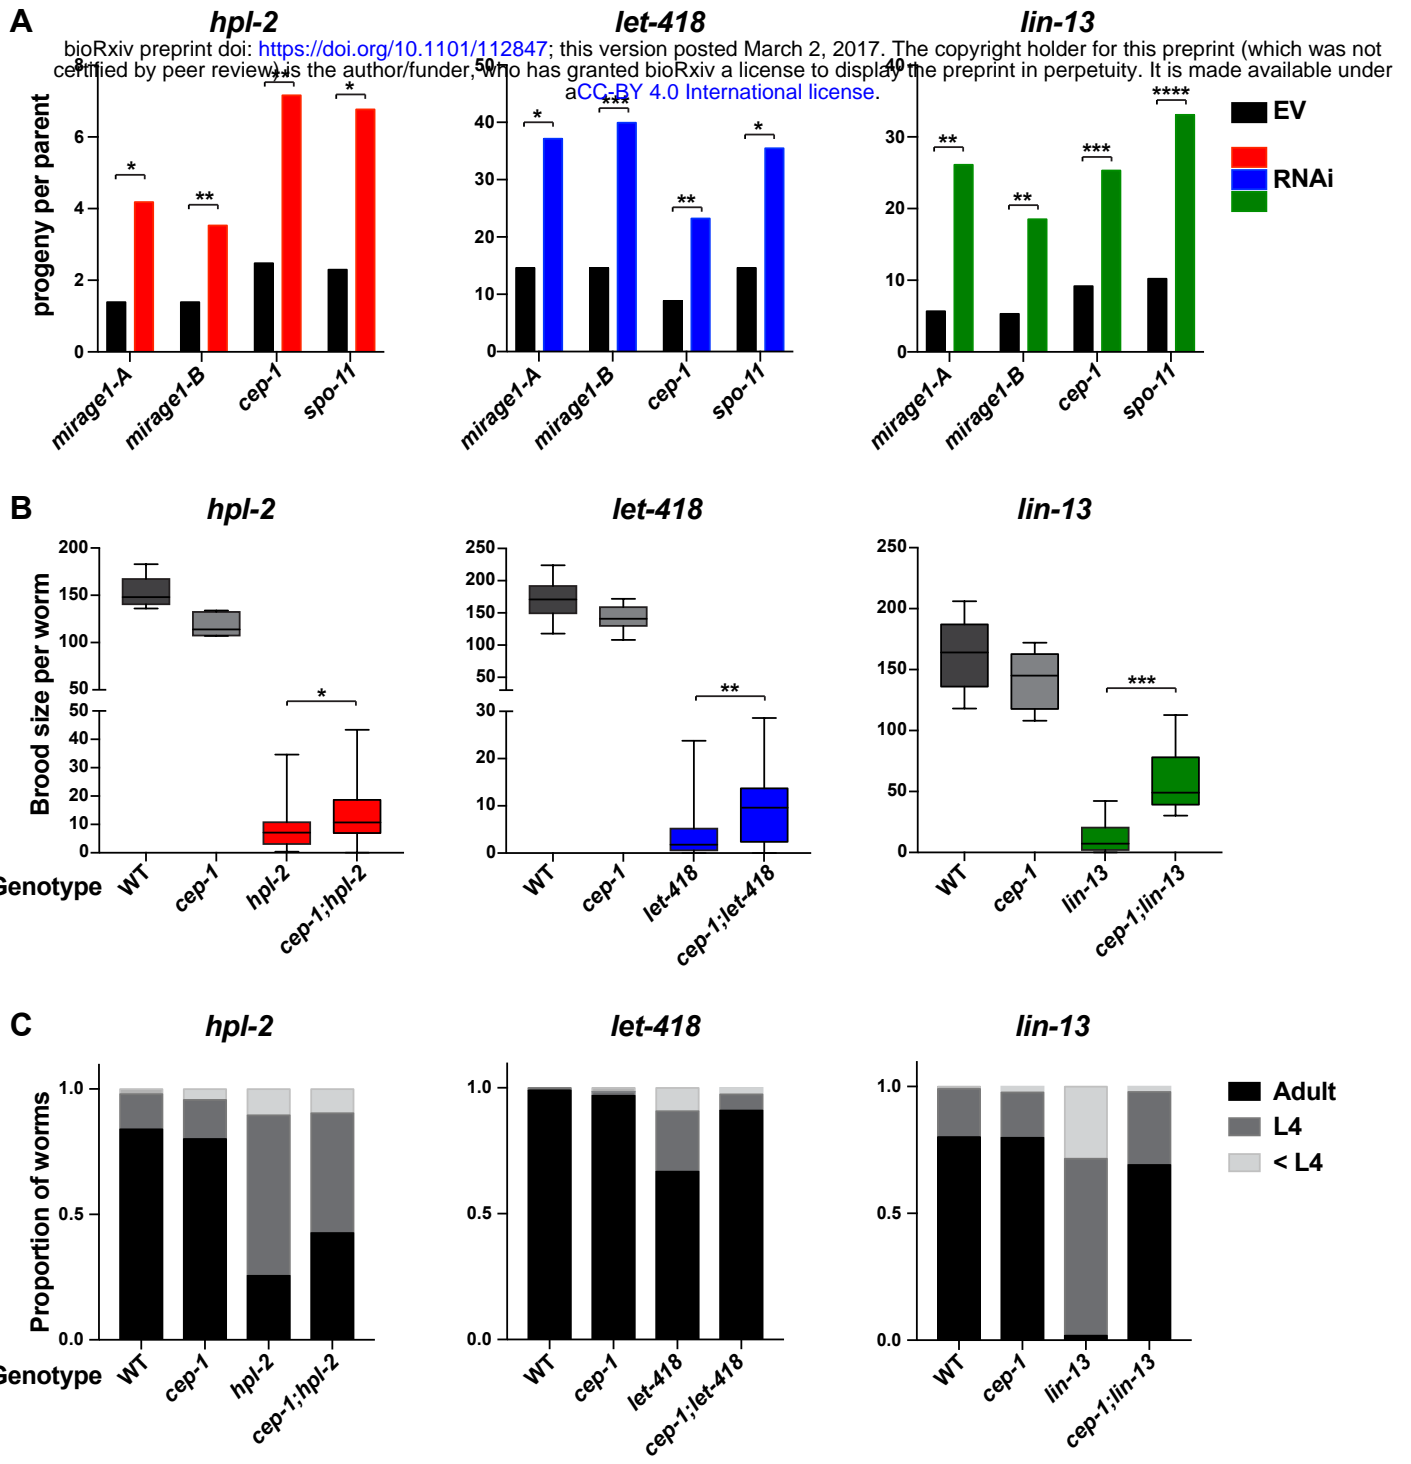

Figure 4

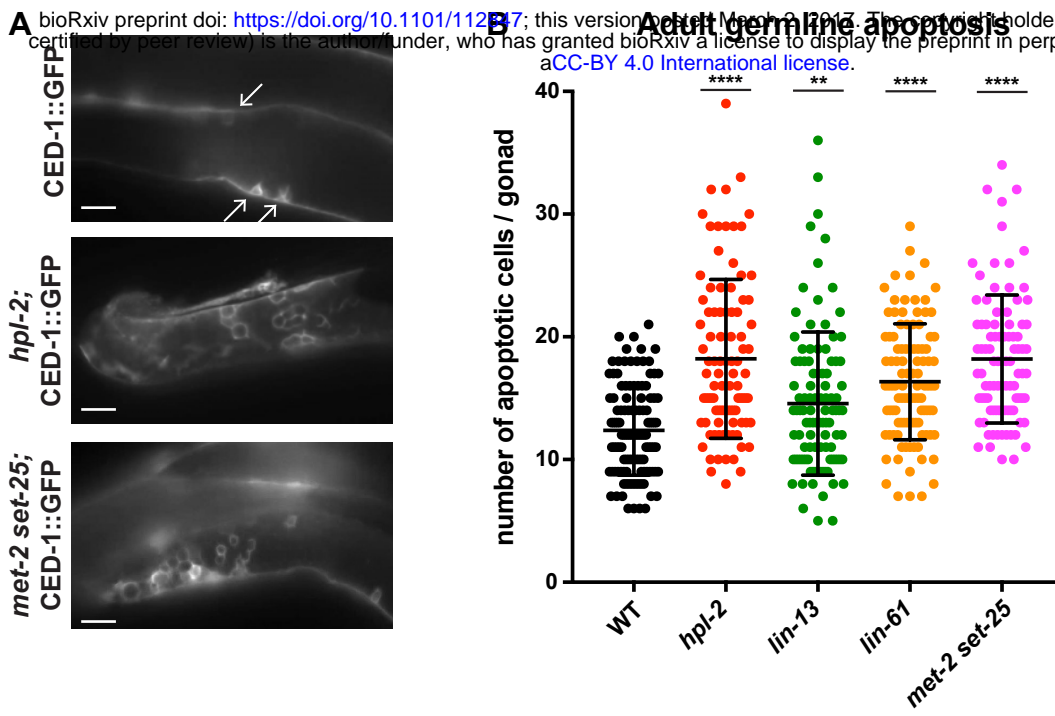

Figure 5



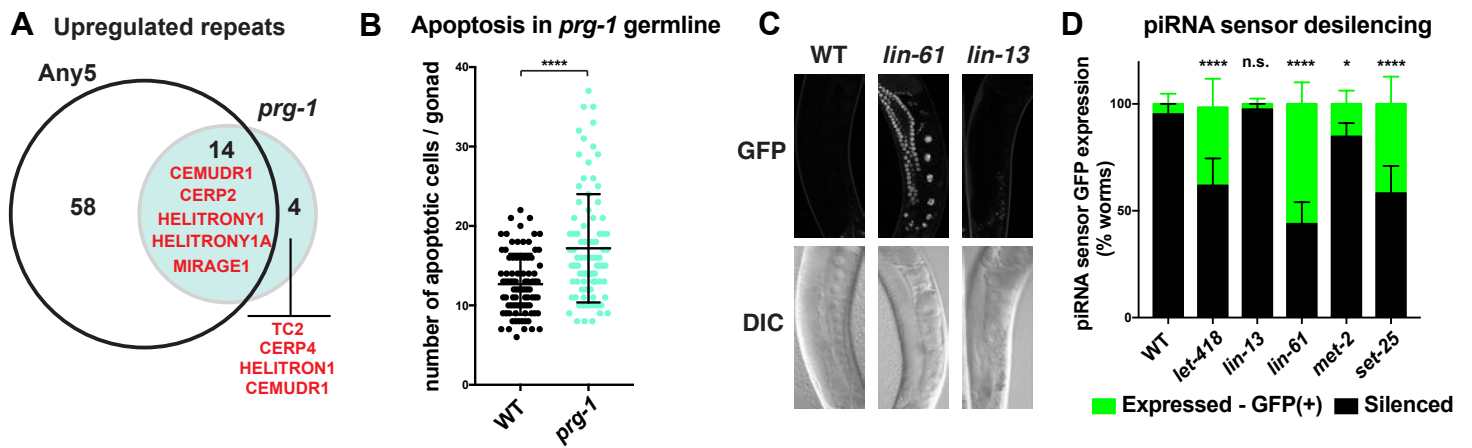

Figure 6

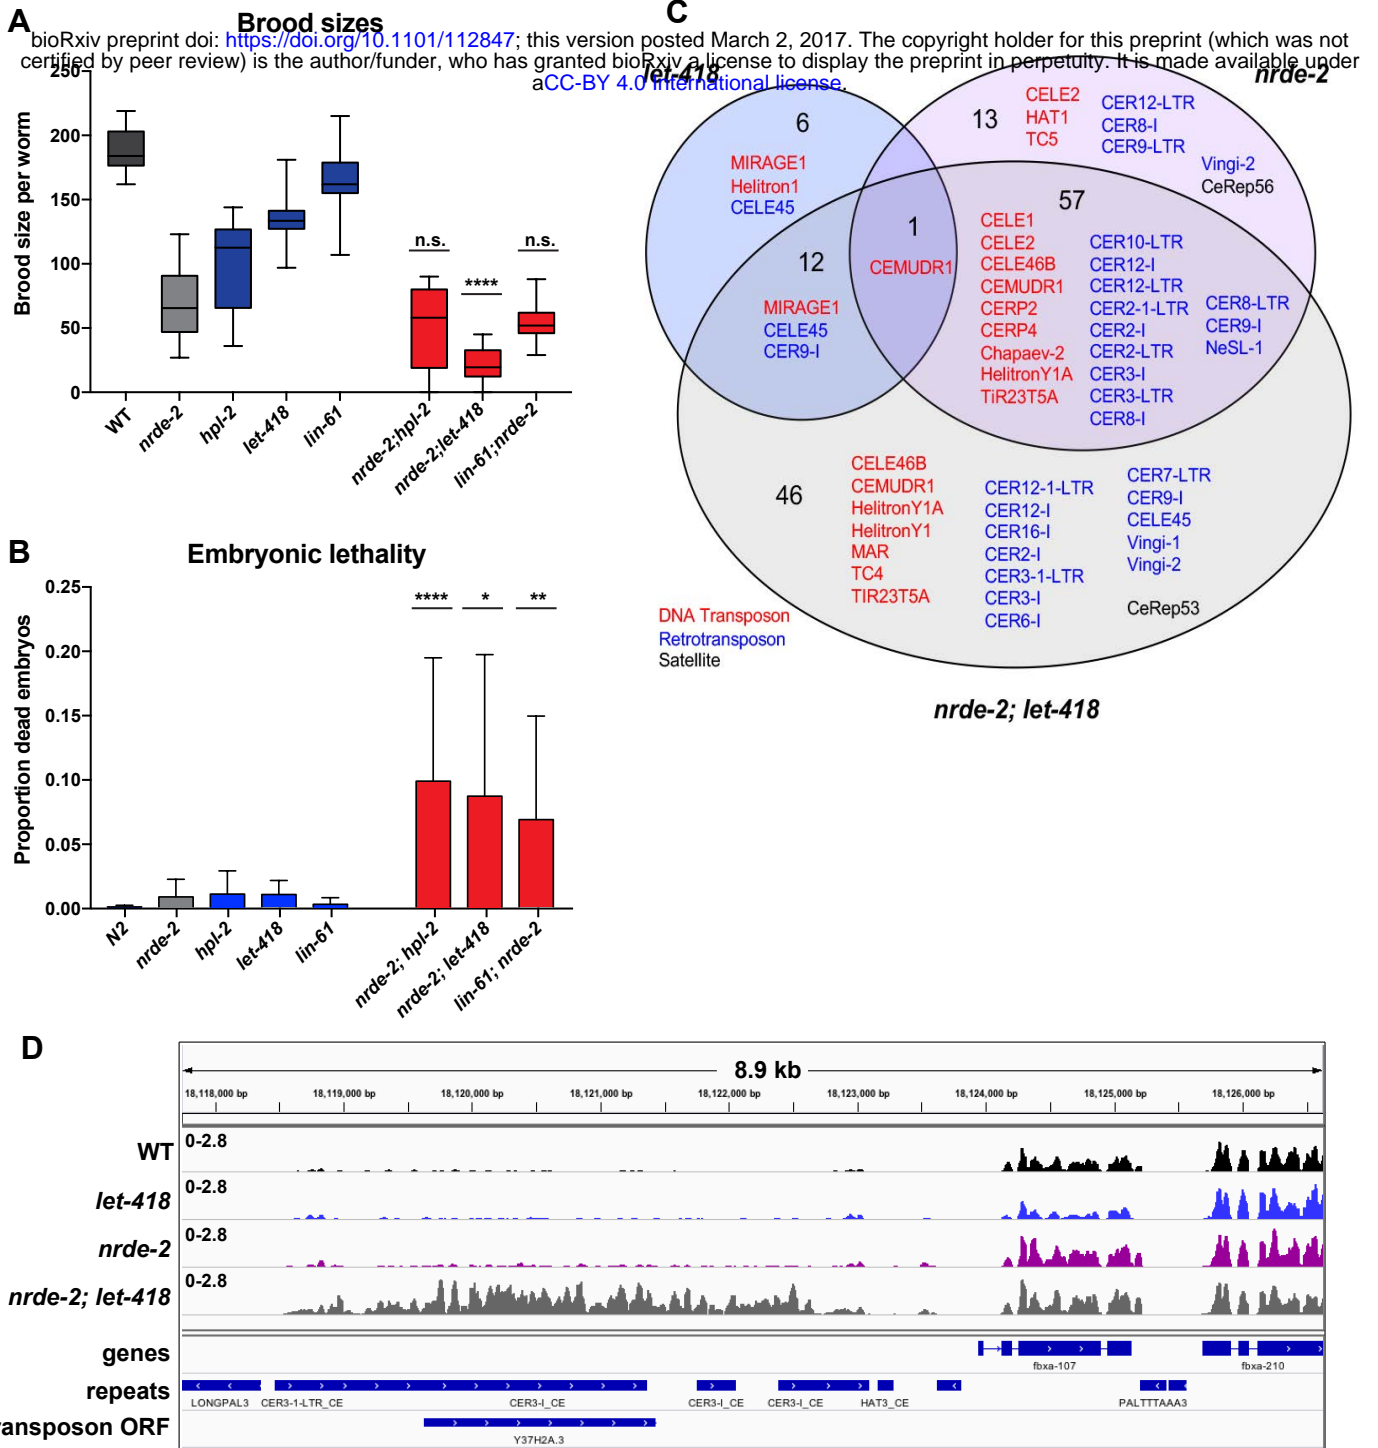

Figure 7

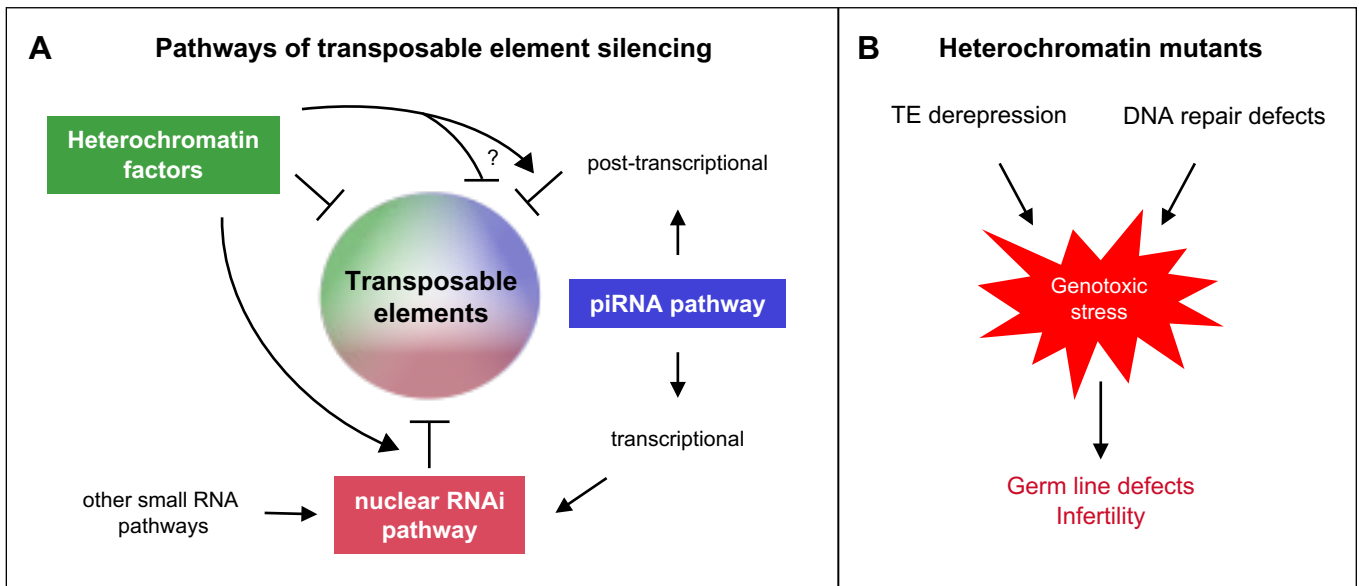

**Figure 8**
